## SUPPORTING INFORMATION

### **The growth of sodic amphibole at the greenschist- to blueschist-facies transition (Dent Blanche, Western Alps): bulk-rock chemical control and thermodynamic modelling**

Paola Manzotti <sup>12\*</sup>, Michel Ballèvre <sup>3</sup>, Pavel Pitra <sup>34</sup>, Benita Putlitz <sup>2</sup>, Martin Robyr <sup>2</sup>, Othmar Müntener <sup>2</sup>

#### **Affiliations:**

<sup>1</sup> Department of Geological Sciences, Stockholm University, 106 91 Stockholm, Sweden

<sup>2</sup> Institute of Earth Sciences, University of Lausanne, Géopolis, Quartier Mouline, 1015 Lausanne, Switzerland

<sup>3</sup> Univ Rennes, CNRS, Géosciences Rennes - UMR 6118, F-35000 Rennes, France

<sup>4</sup> Česká geologická služba, Prague 1, Czech Republic

\*Correspondence: [paola.manzotti@geo.su.se](mailto:paola.manzotti@geo.su.se), Tel. +46 (0)8 16 4745, ORCID: 0000-0002-6945-9878

| Reference                      | Location                                                                  | Rock type / paragenesis                     | Mineral                                | Chemical analyses | Whole rock analysis | Inferred metamorphic facies conditions               |
|--------------------------------|---------------------------------------------------------------------------|---------------------------------------------|----------------------------------------|-------------------|---------------------|------------------------------------------------------|
| Diehl (1938), Stutz (1940)     | Ollomont                                                                  | hornblendite                                | gl                                     |                   | X                   |                                                      |
| Diehl et al. (1952)            | Alpe Berrio                                                               | q-ab-Na am                                  |                                        |                   | X                   |                                                      |
| Hunziker (1974)                | Southern side of Mt Gelé (KAW 943) ? - Ollomont (Alpe Berrio) (KAW 750) ? | q-pl-gl                                     |                                        |                   |                     |                                                      |
| Ayrton et al. (1982)           | Mont Dolin (Arolla Series)                                                | paragneiss, prasinite, calcaires spathiques | am, blue at the core, green at the rim |                   |                     |                                                      |
| Ballèvre & Kienast (1987)      | Becca di Salé                                                             | metachert                                   | blue am                                |                   |                     |                                                      |
| De Leo et al. (1987)           |                                                                           | mylonitic orthogneiss                       | blue am, aeg                           |                   |                     |                                                      |
| Canepa et al. (1990)           |                                                                           |                                             | Fe-gl                                  | X                 |                     | blueschist or glaucophane-bearing greenschist-facies |
| Pennacchioni & Guermani (1993) |                                                                           | Arolla orthogneiss                          | aeg-aug, gl                            |                   |                     | D1 relatively high P<br>D2-D3 greenschist facies     |
| Roda & Zucali (2008, 2011)     | Mont Morion                                                               | metagranite                                 | mrbk, Fe-wnc                           | X                 |                     | blueschist facies                                    |
| Manzotti (2011)                | Roisan-Cignana Shear Zone                                                 | metachert                                   |                                        |                   |                     | blueschist facies                                    |
| Manzotti et al. (2012)         | Becca di Salé, Cuney                                                      | metachert                                   | mrbk, wnc                              | X                 |                     | blueschist facies                                    |
| Baletti et al. (2012)          | Sassa                                                                     | mesocratic meta-gabbro                      | mrbk, wnc                              |                   |                     | blueschist facies                                    |
| Manzotti et al. (2014a)        | Roisan-Cignana Shear Zone                                                 | orthogneiss                                 | mrbk, wnc                              | X                 |                     | blueschist facies                                    |
| Angiboust et al. (2014)        | Mont Dolin , Pas de Chèvres                                               | Arolla gneiss                               | mrbk, wnc                              | X                 |                     | blueschist facies                                    |
| Dal Piaz et al. (2015)         | Arpisson lake, Blavy                                                      |                                             | Fe±gl                                  |                   |                     | blueschist facies                                    |

**TABLE S1** Occurrences of sodic amphibole and/or sodic pyroxene in the DBTS.

### Mineral symbols used in this study

|      |               |
|------|---------------|
| ab   | albite        |
| acm  | acmite        |
| act  | actinolite    |
| aeg  | aegirine      |
| aln  | allanite      |
| alm  | almandine     |
| am   | amphibole     |
| ap   | apatite       |
| aug  | augite        |
| bi   | biotite       |
| cal  | calcite       |
| chl  | chlorite      |
| cor  | corundum      |
| ctd  | chloritoid    |
| cu   | cumingtonite  |
| ep   | epidote       |
| g    | garnet        |
| gl   | glaucophane   |
| gr   | grossular     |
| hem  | hematite      |
| hb   | hornblende    |
| ilm  | ilmenite      |
| kfs  | K-feldspar    |
| jd   | jadeite       |
| ky   | kyanite       |
| law  | lawsonite     |
| mnz  | monazite      |
| mrbk | Mg-riebeckite |
| mt   | magnetite     |
| mu   | muscovite     |
| o    | ompachite     |
| ol   | olivine       |
| pa   | paragonite    |
| pl   | plagioclase   |
| prg  | pargasite     |
| pump | pumpellyite   |
| q    | quartz        |
| ru   | rutile        |
| spss | spessartine   |
| sph  | titanite      |
| srp  | serpentine    |
| st   | staurolite    |
| tr   | tremolite     |
| xm   | xenotime      |
| wnc  | winchite      |
| zrn  | zircon        |

### Other symbols (mole/atomic proportions)

|           |                                     |          |
|-----------|-------------------------------------|----------|
| $X_{Fe}$  | $Fe^{2+} / (Fe^{2+} + Mg)$          | for amp, |
| $X_{Fe3}$ | $Fe^{3+} / (Fe^{3+} + Al)$          | for amp  |
| $X_{ps}$  | $Fe^{3+} / (Fe^{3+} + Al^{3+})$     | for ep   |
| Mg#       | (molar Mg / (Mg+Fe <sup>2+</sup> )) |          |
| alm       | Fe/(Fe + Mg + Ca + Mn)              |          |
| py        | Mg/(Fe + Mg + Ca + Mn)              |          |
| gr        | Ca/(Fe + Mg + Ca + Mn)              |          |
| spss      | Mn/(Fe + Mg + Ca + Mn)              |          |
| $X_{Na}$  | Na / (Na + Ca)                      | amp      |
| a.p.f.u.  | per formula unit                    |          |
| wt%       | weight per cent                     |          |
| mol. %    | mole per cent                       |          |
| vol. %    | volume per cent                     |          |

TABLE S2: Mineral and other symbols used in this study.

|                                  | Na amphibole |       | Na-Ca amphibole |       | Ca amphibole |       |       |       |       | Chlorite |       | Epidote |                     |                    |
|----------------------------------|--------------|-------|-----------------|-------|--------------|-------|-------|-------|-------|----------|-------|---------|---------------------|--------------------|
|                                  | OL02         | OL02  | OL02            | OL02  | OL02         | OL02  | OL02  | OL02  | OL02  | OL02     | OL02  | OL02    | OL02                |                    |
|                                  | mrbk         | mrbk  | wnc             | wnc   | act          | act   | Mg-hb | prg   | prg   | edn      | chl   | chl     | ep core<br>(matrix) | ep rim<br>(matrix) |
| SiO <sub>2</sub>                 | 54.75        | 54.82 | 55.68           | 55.12 | 52.54        | 54.14 | 50.66 | 44.24 | 43.76 | 45.61    | 29.26 | 29.48   | 38.43               | 37.71              |
| TiO <sub>2</sub>                 | 0.03         | 0.01  | 0.02            | 0.03  | 0.02         | 0.00  | 0.62  | 0.95  | 1.42  | 1.13     | 0.04  | 0.07    | 0.00                | 0.04               |
| Al <sub>2</sub> O <sub>3</sub>   | 3.95         | 3.28  | 1.84            | 1.52  | 2.89         | 1.47  | 5.82  | 13.24 | 12.61 | 10.50    | 17.02 | 16.88   | 27.09               | 22.04              |
| Fe <sub>2</sub> O <sub>3</sub> * | 24.49        | 22.02 | 16.87           | 16.63 | 18.52        | 15.65 | 14.87 | 11.99 | 13.17 | 15.20    | 26.79 | 26.57   | 9.06                | 14.83              |
| MnO                              | 0.07         | 0.07  | 0.15            | 0.17  | 0.18         | 0.17  | 0.17  | 0.14  | 0.13  | 0.14     | 0.25  | 0.23    | 0.13                | 0.11               |
| NiO                              | 0.02         | <0.01 | <0.01           | <0.01 | <0.01        | <0.01 | <0.01 | <0.01 | 0.01  | <0.01    | <0.01 | 0.03    | <0.01               | 0.01               |
| MgO                              | 7.96         | 9.60  | 13.89           | 14.18 | 12.73        | 14.87 | 13.89 | 13.73 | 13.36 | 13.05    | 15.88 | 15.91   | <0.01               | 0.11               |
| CaO                              | 1.48         | 2.55  | 8.16            | 8.90  | 10.34        | 11.99 | 10.98 | 12.30 | 12.12 | 11.07    | 1.03  | 0.94    | 24.23               | 23.76              |
| Na <sub>2</sub> O                | 6.40         | 5.71  | 2.66            | 2.34  | 1.56         | 0.57  | 1.64  | 1.72  | 1.85  | 1.84     | 0.08  | 0.18    | 0.02                | <0.01              |
| K <sub>2</sub> O                 | 0.03         | 0.03  | 0.04            | 0.09  | 0.17         | 0.10  | 0.19  | 0.66  | 0.64  | 0.60     | 0.03  | <0.01   | <0.01               | <0.01              |
| F                                | 0.03         | <0.01 | 0.05            | 0.04  | 0.09         | 0.08  | 0.08  | 0.11  | 0.17  | 0.09     | <0.01 | <0.01   | <0.01               | <0.01              |
| Total                            | 99.21        | 98.09 | 99.36           | 99.02 | 99.04        | 99.04 | 98.92 | 99.08 | 99.24 | 99.23    | 90.38 | 90.30   | 98.96               | 98.61              |
| Oxygen                           | 13           | 13    | 13              | 13    | 13           | 13    | 13    | 13    | 13    | 13       | 28    | 28      | 12.5                | 12.5               |
| Si                               | 7.93         | 8.00  | 7.92            | 7.90  | 7.67         | 7.82  | 7.32  | 6.42  | 6.40  | 6.73     | 6.12  | 6.16    | 2.97                | 2.99               |
| Ti                               | 0.00         | 0.00  | 0.00            | 0.00  | 0.00         | 0.00  | 0.07  | 0.10  | 0.16  | 0.13     | 0.01  | 0.01    | 0.00                | 0.00               |
| Al                               | 0.67         | 0.50  | 0.31            | 0.26  | 0.50         | 0.25  | 0.99  | 2.27  | 2.17  | 1.83     | 4.19  | 4.16    | 2.53                | 2.07               |
| Fe <sup>3+</sup>                 | 1.21         | 1.21  | 0.62            | 0.54  | 0.44         | 0.21  | 0.35  | 0.08  | 0.08  | 0.00     | 0.00  | 0.00    | 0.47                | 0.90               |
| Fe <sup>2+</sup>                 | 1.46         | 1.39  | 1.19            | 1.25  | 1.59         | 1.49  | 1.26  | 1.23  | 1.37  | 1.69     | 4.22  | 4.18    | 0.00                | 0.00               |
| Mn                               | 0.01         | 0.01  | 0.02            | 0.02  | 0.02         | 0.02  | 0.02  | 0.02  | 0.02  | 0.02     | 0.04  | 0.04    | 0.01                | 0.01               |
| Ni                               | 0.00         | 0.00  | 0.00            | 0.00  | 0.00         | 0.00  | 0.00  | 0.00  | 0.00  | 0.00     | 0.00  | 0.01    | 0.00                | 0.00               |
| Mg                               | 1.72         | 1.89  | 2.95            | 3.03  | 2.77         | 3.20  | 2.99  | 2.97  | 2.91  | 2.87     | 4.95  | 4.95    | 0.00                | 0.00               |
| Ca                               | 0.23         | 0.27  | 1.24            | 1.37  | 1.62         | 1.86  | 1.70  | 1.91  | 1.90  | 1.75     | 0.23  | 0.21    | 2.02                | 2.02               |
| Na                               | 1.80         | 1.75  | 0.73            | 0.65  | 0.44         | 0.16  | 0.46  | 0.48  | 0.52  | 0.53     | 0.03  | 0.07    | 0.00                | 0.00               |
| K                                | 0.01         | 0.01  | 0.01            | 0.02  | 0.03         | 0.02  | 0.03  | 0.12  | 0.12  | 0.11     | 0.01  | 0.02    | 0.00                | 0.00               |
| F                                | 0.01         | 0.00  | 0.02            | 0.02  | 0.04         | 0.04  | 1.96  | 0.05  | 0.08  | 0.04     | 0.00  | 0.00    | 0.00                | 0.00               |
| Total                            | 15.03        | 15.02 | 14.98           | 15.03 | 15.09        | 15.03 | 15.19 | 15.61 | 15.64 | 15.64    | 19.80 | 19.80   | 8.00                | 7.99               |
| $X_{Mg}$                         | 0.54         | 0.58  | 0.71            | 0.71  | 0.64         | 0.68  | 0.70  | 0.71  | 0.68  | 0.63     | 0.54  | 0.54    |                     |                    |
| [IV]Al                           | 0.07         | 0.60  | 0.08            | 0.10  | 0.33         | 0.18  | 0.68  | 1.58  | 1.60  | 1.27     |       |         |                     |                    |
| [VI]Al                           | 0.00         | 0.50  | 0.23            | 0.16  | 0.17         | 0.07  | 0.31  | 0.69  | 0.57  | 0.55     |       |         |                     |                    |

**TABLE S3** Representative mineral analyses from hornblendite (sample OL02, site 1). Fe<sub>2</sub>O<sub>3</sub>\* is the total amount of iron.

|                                  | Muscovite |       | Chlorite |       | Plagioclase |        | Epidote |        | Muscovite |       |       | Epidote |         | Plagioclase |        |
|----------------------------------|-----------|-------|----------|-------|-------------|--------|---------|--------|-----------|-------|-------|---------|---------|-------------|--------|
|                                  | OL25      | OL25  | OL25     | OL25  | OL25        | OL25   | OL25    | OL25   | OL24      | OL24  | OL24  | OL24    | OL24    | OL24        | OL24   |
|                                  | mu        | mu    | chl      | chl   | ab          | ab     | ep core | ep rim | mu        | mu    | mu    | ep rim  | ep core | ab          | ab     |
| SiO <sub>2</sub>                 | 50.74     | 50.58 | 26.54    | 27.89 | 69.22       | 69.10  | 37.57   | 36.87  | 49.76     | 49.96 | 49.84 | 37.35   | 38.25   | 69.34       | 69.44  |
| TiO <sub>2</sub>                 | 0.06      | 0.05  | 0.08     | 0.05  | 0.00        | 0.00   | 0.09    | 0.13   | 0.07      | 0.10  | 0.08  | 0.08    | 0.16    | 0.00        | 0.00   |
| Al <sub>2</sub> O <sub>3</sub>   | 24.79     | 23.60 | 19.88    | 20.06 | 19.57       | 19.83  | 24.80   | 21.78  | 27.35     | 25.22 | 26.93 | 22.93   | 26.25   | 19.66       | 19.58  |
| Fe <sub>2</sub> O <sub>3</sub> * | 5.02      | 6.13  | 25.27    | 23.96 | 0.04        | <0.01  | 10.84   | 14.13  | 4.42      | 5.88  | 4.42  | 13.00   | 8.97    | 0.08        | 0.06   |
| MnO                              | 0.12      | 0.17  | 0.51     | 0.45  | 0.01        | <0.01  | 0.16    | 0.55   | 0.15      | 0.15  | 0.16  | 0.39    | 0.13    | <0.01       | <0.01  |
| NiO                              | <0.01     | <0.01 | <0.01    | <0.01 | <0.01       | <0.01  | <0.01   | <0.01  | <0.01     | <0.01 | <0.01 | <0.01   | <0.01   | <0.01       | <0.01  |
| MgO                              | 3.34      | 3.35  | 16.21    | 15.24 | 0.01        | 0.00   | 0.02    | 0.00   | 2.76      | 3.04  | 2.78  | 0.01    | 0.02    | <0.01       | <0.01  |
| CaO                              | 0.02      | 0.00  | 0.05     | 0.06  | 0.06        | 0.19   | 23.69   | 22.72  | 0.02      | 0.01  | 0.02  | 23.24   | 23.93   | 0.08        | 0.03   |
| Na <sub>2</sub> O                | 0.07      | 0.06  | 0.01     | 0.01  | 11.81       | 11.74  | 0.01    | 0.01   | 0.20      | 0.11  | 0.19  | 0.01    | <0.01   | 11.75       | 11.88  |
| K <sub>2</sub> O                 | 11.01     | 11.04 | 0.06     | 0.66  | 0.09        | 0.09   | <0.01   | <0.01  | 11.12     | 11.61 | 11.21 | <0.01   | <0.01   | 0.09        | 0.09   |
| F                                | <0.01     | <0.01 | <0.01    | <0.01 | <0.01       | <0.01  | <0.01   | <0.01  | <0.01     | <0.01 | <0.01 | <0.01   | <0.01   | <0.01       | <0.01  |
| Total                            | 95.17     | 94.98 | 88.62    | 88.37 | 100.81      | 100.95 | 97.18   | 96.19  | 95.85     | 96.08 | 95.63 | 97.02   | 97.71   | 101.00      | 101.08 |
| Oxygen                           | 11        | 11    | 28       | 28    | 8           | 8      | 12.5    | 12.5   | 11        | 11    | 11    | 12.5    | 12.5    | 8           | 8      |
| Si                               | 3.46      | 3.48  | 5.63     | 5.87  | 3.00        | 2.99   | 2.99    | 3.01   | 3.36      | 3.41  | 3.38  | 3.00    | 3.00    | 3.00        | 3.00   |
| Ti                               | 0.00      | 0.00  | 0.01     | 0.01  | 0.00        | 0.00   | 0.01    | 0.01   | 0.00      | 0.01  | 0.00  | 0.01    | 0.01    | 1.00        | 0.00   |
| Al                               | 1.99      | 1.91  | 4.97     | 4.98  | 1.00        | 1.01   | 2.32    | 2.09   | 2.18      | 2.03  | 2.15  | 2.17    | 2.43    | 0.00        | 1.00   |
| Fe <sup>3+</sup>                 | 0.00      | 0.00  | 0.00     | 0.00  | 0.00        | 0.00   | 0.65    | 0.87   | 0.00      | 0.00  | 0.00  | 0.79    | 0.53    | 0.00        | 0.00   |
| Fe <sup>2+</sup>                 | 0.26      | 0.32  | 4.03     | 3.80  | 0.00        | 0.00   | 0.00    | 0.00   | 0.22      | 0.30  | 0.23  | 0.00    | 0.00    | 0.00        | 0.00   |
| Mn                               | 0.01      | 0.01  | 0.09     | 0.08  | 0.00        | 0.00   | 0.01    | 0.04   | 0.01      | 0.01  | 0.01  | 0.03    | 0.01    | 0.00        | 0.00   |
| Ni                               | 0.00      | 0.00  | 0.00     | 0.00  | 0.00        | 0.00   | 0.00    | 0.00   | 0.00      | 0.00  | 0.00  | 0.00    | 0.00    | 0.00        | 0.00   |
| Mg                               | 0.34      | 0.34  | 5.12     | 4.79  | 0.00        | 0.00   | 0.00    | 0.00   | 0.28      | 0.31  | 0.28  | 0.00    | 0.00    | 0.00        | 0.00   |
| Ca                               | 0.00      | 0.00  | 0.01     | 0.01  | 0.00        | 0.01   | 2.02    | 1.99   | 0.00      | 0.00  | 0.00  | 2.00    | 2.01    | 0.00        | 0.00   |
| Na                               | 0.01      | 0.01  | 0.01     | 0.00  | 0.99        | 0.99   | 0.01    | 0.02   | 0.03      | 0.02  | 0.02  | 0.00    | 0.01    | 0.99        | 1.00   |
| K                                | 0.96      | 0.97  | 0.02     | 0.18  | 0.01        | 0.01   | 0.00    | 0.00   | 0.96      | 1.01  | 0.97  | 0.00    | 0.00    | 0.01        | 0.01   |
| F                                | 0.00      | 0.00  | 0.00     | 0.00  | 0.00        | 0.00   | 0.00    | 0.00   | 0.00      | 0.00  | 0.00  | 0.00    | 0.00    | 0.00        | 0.00   |
| Total                            | 7.03      | 7.05  | 19.89    | 19.72 | 5.00        | 5.00   | 8.01    | 8.03   | 7.04      | 7.09  | 7.04  | 8.00    | 8.00    | 5.00        | 5.00   |
| X <sub>Mg</sub>                  | 0.57      | 0.52  | 0.56     | 0.56  |             |        |         |        | 0.55      | 0.51  | 0.55  |         |         |             |        |

**TABLE S4** Representative mineral analyses from foliated and mylonitic orthogneisses (samples OL25 and OL24 respectively, site 2). Fe<sub>2</sub>O<sub>3</sub>\* is the total amount of iron.

|                                  | Muscovite |       |       | Epidote |        | Plagioclase |        | Na amphibole |       |       |       | Na-Ca amphibole |       | Ca-amphibole |       | Epidote |       |
|----------------------------------|-----------|-------|-------|---------|--------|-------------|--------|--------------|-------|-------|-------|-----------------|-------|--------------|-------|---------|-------|
|                                  | OL23      | OL23  | OL23  | OL23    | OL23   | OL23        | OL23   | OL50         | OL50  | OL50  | OL50  | OL50            | OL50  | OL50         | OL50  | OL50    | OL50  |
|                                  | mu        | mu    | mu    | ep core | ep rim | ab          | ab     | gl           | gl    | mrbk  | mrbk  | wnc             | wnc   | act          | act   | ep      | ep    |
| SiO <sub>2</sub>                 | 49.87     | 49.95 | 49.71 | 37.92   | 37.23  | 69.44       | 69.31  | 56.55        | 56.54 | 55.84 | 55.38 | 55.20           | 54.43 | 54.89        | 54.61 | 37.99   | 37.48 |
| TiO <sub>2</sub>                 | 0.10      | 0.06  | 0.05  | 0.07    | 0.01   | <0.01       | <0.01  | 0.02         | 0.01  | 0.44  | 0.07  | 0.02            | 0.03  | 0.01         | 0.02  | 0.25    | 0.12  |
| Al <sub>2</sub> O <sub>3</sub>   | 25.31     | 25.47 | 26.44 | 25.62   | 22.25  | 19.58       | 19.74  | 5.89         | 6.42  | 4.56  | 4.00  | 1.80            | 1.96  | 1.38         | 1.67  | 26.52   | 23.41 |
| Fe <sub>2</sub> O <sub>3</sub> * | 6.11      | 5.90  | 5.31  | 9.92    | 14.09  | 0.06        | 0.01   | 19.55        | 19.04 | 20.04 | 22.05 | 16.64           | 16.08 | 14.97        | 15.34 | 8.27    | 13.25 |
| MnO                              | 0.14      | 0.18  | 0.15  | 0.21    | 0.28   | <0.01       | <0.01  | 0.22         | 0.24  | 0.27  | 0.23  | 0.44            | 0.52  | 0.56         | 0.53  | 0.23    | 0.48  |
| NiO                              | <0.01     | <0.01 | <0.01 | <0.01   | <0.01  | <0.01       | <0.01  | <0.01        | <0.01 | <0.01 | <0.01 | 0.02            | 0.01  | <0.01        | <0.01 | <0.01   | <0.01 |
| MgO                              | 2.86      | 2.93  | 2.74  | 0.02    | 0.01   | <0.01       | <0.01  | 9.12         | 9.00  | 9.57  | 9.33  | 13.92           | 14.28 | 14.85        | 14.75 | 0.04    | 0.15  |
| CaO                              | 0.07      | 0.03  | <0.01 | 23.94   | 23.08  | 0.03        | 0.13   | 0.66         | 0.55  | 1.33  | 1.43  | 8.24            | 9.41  | 11.20        | 10.52 | 23.89   | 22.95 |
| Na <sub>2</sub> O                | 0.12      | 0.10  | 0.14  | 0.01    | 0.01   | 11.88       | 11.79  | 6.87         | 7.03  | 6.55  | 6.53  | 2.70            | 1.99  | 0.91         | 1.37  | 0.02    | <0.01 |
| K <sub>2</sub> O                 | 11.22     | 11.32 | 11.63 | <0.01   | <0.01  | 0.09        | 0.07   | <0.01        | 0.03  | 0.04  | 0.05  | 0.08            | 0.08  | 0.10         | 0.09  | <0.01   | <0.01 |
| F                                | <0.01     | <0.01 | <0.01 | <0.01   | <0.01  | <0.01       | <0.01  | 0.07         | 0.07  | 0.06  | 0.09  | 0.10            | 0.12  | 0.12         | 0.12  | <0.01   | <0.01 |
| Total                            | 95.80     | 95.94 | 96.17 | 97.71   | 96.96  | 101.08      | 101.05 | 98.95        | 98.93 | 98.70 | 99.16 | 99.16           | 98.91 | 98.99        | 99.02 | 97.21   | 97.84 |
| Oxygen                           | 11        | 11    | 11    | 12.5    | 12.5   | 8           | 8      | 13           | 13    | 13    | 13    | 13              | 13    | 13           | 13    | 12.5    | 12.5  |
| Si                               | 3.41      | 3.41  | 3.38  | 2.99    | 3.01   | 3.00        | 3.00   | 7.99         | 7.98  | 7.97  | 7.93  | 7.89            | 7.81  | 7.89         | 7.84  | 2.99    | 2.98  |
| Ti                               | 0.00      | 0.00  | 0.00  | 0.00    | 0.00   | 0.00        | 0.00   | 0.00         | 0.00  | 0.05  | 0.01  | 0.00            | 0.00  | 0.00         | 0.00  | 0.02    | 0.01  |
| Al                               | 2.04      | 2.05  | 2.12  | 2.38    | 2.12   | 1.00        | 1.01   | 0.98         | 1.07  | 0.77  | 0.67  | 0.30            | 0.33  | 0.23         | 0.28  | 2.46    | 2.19  |
| Fe <sup>3+</sup>                 | 0.00      | 0.00  | 0.00  | 0.59    | 0.86   | 0.00        | 0.00   | 0.95         | 0.86  | 0.98  | 1.20  | 0.63            | 0.58  | 0.25         | 0.40  | 0.49    | 0.79  |
| Fe <sup>2+</sup>                 | 0.31      | 0.30  | 0.27  | 0.00    | 0.00   | 0.00        | 0.00   | 1.13         | 1.16  | 1.17  | 1.17  | 1.16            | 1.16  | 1.37         | 1.25  | 0.00    | 0.00  |
| Mn                               | 0.01      | 0.01  | 0.01  | 0.01    | 0.02   | 0.00        | 0.00   | 0.03         | 0.03  | 0.03  | 0.03  | 0.05            | 0.06  | 0.07         | 0.06  | 0.02    | 0.03  |
| Ni                               | 0.00      | 0.00  | 0.00  | 0.00    | 0.00   | 0.00        | 0.00   | 0.00         | 0.00  | 0.00  | 0.00  | 0.00            | 0.00  | 0.00         | 0.00  | 0.00    | 0.00  |
| Mg                               | 0.29      | 0.30  | 0.28  | 0.00    | 0.00   | 0.00        | 0.00   | 1.92         | 1.89  | 2.04  | 1.99  | 2.96            | 3.05  | 3.18         | 3.16  | 0.00    | 0.02  |
| Ca                               | 0.01      | 0.00  | 0.00  | 2.02    | 2.00   | 0.00        | 0.01   | 0.10         | 0.08  | 0.20  | 0.22  | 1.26            | 1.45  | 1.73         | 1.62  | 2.02    | 1.96  |
| Na                               | 0.02      | 0.01  | 0.02  | 0.02    | 0.01   | 1.00        | 0.99   | 1.88         | 1.92  | 1.81  | 1.81  | 0.75            | 0.55  | 0.25         | 0.38  | 0.01    | 0.00  |
| K                                | 0.98      | 0.98  | 1.01  | 0.00    | 0.00   | 0.01        | 0.00   | 0.00         | 0.00  | 0.01  | 0.01  | 0.02            | 0.01  | 0.02         | 0.02  | 0.00    | 0.00  |
| F                                | 0.00      | 0.00  | 0.00  | 0.00    | 0.00   | 0.00        | 0.00   | 0.03         | 0.03  | 0.03  | 0.04  | 0.05            | 0.06  | 0.06         | 0.05  | 0.00    | 0.00  |
| Total                            | 7.06      | 7.07  | 7.08  | 8.01    | 8.02   | 5.00        | 5.00   | 14.98        | 15.01 | 15.02 | 15.04 | 15.02           | 15.02 | 15.00        | 15.02 | 8.01    | 7.98  |
| $X_{Mg}$                         | 0.48      | 0.50  | 0.51  |         |        |             |        | 0.63         | 0.62  | 0.63  | 0.63  | 0.72            | 0.73  | 0.70         | 0.72  |         |       |
| [IV]Al                           |           |       |       |         |        |             |        | 0.01         | 0.02  | 0.03  | 0.07  | 0.11            | 0.19  | 0.11         | 0.16  |         |       |
| [VI]Al                           |           |       |       |         |        |             |        | 0.97         | 1.05  | 0.73  | 0.60  | 0.19            | 0.14  | 0.13         | 0.12  |         |       |

**TABLE S5** Representative mineral analyses from mylonitic orthogneisses and amphibole gneiss (samples OL23 and OL50, site 2). Fe<sub>2</sub>O<sub>3</sub>\* is the total amount of iron.

|                                  | Na amphibole |       |       |       | Na-Ca amphibole |       | Ca amphibole |       | Na clinopyroxene |         | Epidote |       | Na amphibole |       | Na-Ca amphibole |       | Ca-amphibole |       | Epidote |      |
|----------------------------------|--------------|-------|-------|-------|-----------------|-------|--------------|-------|------------------|---------|---------|-------|--------------|-------|-----------------|-------|--------------|-------|---------|------|
|                                  | OL68B        | OL68B | OL68B | OL68B | OL68B           | OL68B | OL68B        | OL68B | OL68B            | OL68B   | OL68B   | OL68B | OL61         | OL61  | OL61            | OL61  | OL61         | OL61  | OL61    | OL61 |
|                                  | gl           | gl    | mrbk  | mrbk  | wnc             | wnc   | act          | act   | aeg-aug          | aeg-aug | ep      | ep    | mrbk         | wnc   | wnc             | act   | act          | ep    | ep      |      |
| SiO <sub>2</sub>                 | 56.58        | 55.62 | 55.05 | 54.27 | 55.88           | 54.72 | 53.01        | 53.56 | 54.41            | 54.28   | 38.14   | 37.77 | 56.13        | 55.84 | 55.53           | 53.03 | 55.26        | 37.43 | 37.53   |      |
| TiO <sub>2</sub>                 | 0.37         | 0.02  | 0.11  | 0.09  | 0.06            | <0.01 | <0.01        | <0.01 | 0.11             | 0.19    | 0.09    | 0.09  | 0.03         | 0.02  | 0.03            | <0.01 | 0.01         | 0.10  | 0.10    |      |
| Al <sub>2</sub> O <sub>3</sub>   | 6.70         | 7.26  | 3.08  | 3.92  | 1.74            | 3.57  | 1.51         | 1.47  | 5.64             | 4.66    | 24.80   | 25.08 | 3.66         | 2.16  | 2.43            | 1.88  | 1.05         | 24.52 | 24.65   |      |
| Fe <sub>2</sub> O <sub>3</sub> * | 16.91        | 17.81 | 19.49 | 23.43 | 13.65           | 21.47 | 20.83        | 18.20 | 16.83            | 16.63   | 12.42   | 11.27 | 17.96        | 13.06 | 16.17           | 19.69 | 16.10        | 12.36 | 12.46   |      |
| MnO                              | 0.23         | 0.31  | 0.30  | 0.28  | 0.39            | 0.23  | 0.44         | 0.49  | 0.32             | 0.39    | 0.29    | 0.20  | 0.28         | 0.38  | 0.39            | 0.45  | 0.46         | 0.28  | 0.30    |      |
| NiO                              | <0.01        | <0.01 | <0.01 | <0.01 | <0.01           | <0.01 | <0.01        | <0.01 | <0.01            | <0.01   | <0.01   | <0.01 | <0.01        | 0.02  | <0.01           | 0.01  | 0.02         | <0.01 | <0.01   |      |
| MgO                              | 9.77         | 8.54  | 11.43 | 8.82  | 15.84           | 9.70  | 11.73        | 13.78 | 5.23             | 5.90    | 0.01    | 0.02  | 11.38        | 15.53 | 13.58           | 12.05 | 14.49        | 0.06  | 0.01    |      |
| CaO                              | 0.83         | 0.34  | 4.80  | 1.97  | 8.54            | 4.41  | 10.93        | 11.59 | 9.91             | 10.83   | 23.15   | 23.14 | 2.61         | 9.45  | 6.33            | 10.73 | 10.20        | 22.61 | 23.38   |      |
| Na <sub>2</sub> O                | 6.85         | 6.96  | 4.53  | 6.04  | 2.49            | 4.49  | 1.08         | 0.79  | 8.34             | 8.23    | <0.01   | <0.01 | 5.70         | 2.28  | 3.72            | 1.15  | 1.56         | <0.01 | <0.01   |      |
| K <sub>2</sub> O                 | <0.01        | 0.02  | 0.09  | 0.08  | 0.06            | 0.08  | 0.09         | 0.10  | <0.01            | <0.01   | <0.01   | <0.01 | 0.03         | 0.08  | 0.08            | 0.13  | 0.08         | <0.01 | <0.01   |      |
| F                                | <0.01        | 0.07  | <0.01 | <0.01 | <0.01           | <0.01 | <0.01        | <0.01 | <0.01            | <0.01   | <0.01   | <0.01 | <0.01        | 0.11  | 0.09            | <0.01 | 0.06         | <0.01 | <0.01   |      |
| Total                            | 98.24        | 96.96 | 98.88 | 98.90 | 98.65           | 98.67 | 99.62        | 99.98 | 100.79           | 101.11  | 98.91   | 97.57 | 97.78        | 98.93 | 98.35           | 99.12 | 99.29        | 97.36 | 98.43   |      |
| Oxygen                           | 13           | 13    | 13    | 13    | 13              | 13    | 13           | 13    | 6                | 6       | 12.5    | 12.5  | 13           | 13    | 13              | 13    | 13           | 12.5  | 12.5    |      |
| Si                               | 7.97         | 7.98  | 7.89  | 7.84  | 7.88            | 7.93  | 7.95         | 7.85  | 2.00             | 1.99    | 2.99    | 2.99  | 8.00         | 7.92  | 7.92            | 7.80  | 7.93         | 2.97  | 2.96    |      |
| Ti                               | 0.04         | 0.00  | 0.01  | 0.01  | 0.01            | 0.00  | 0.00         | 0.00  | 0.00             | 0.01    | 0.01    | 0.01  | 0.00         | 0.00  | 0.00            | 0.00  | 0.00         | 0.01  | 0.01    |      |
| Al                               | 1.11         | 1.23  | 0.52  | 0.67  | 0.29            | 0.61  | 0.27         | 0.25  | 0.25             | 0.20    | 2.29    | 2.34  | 0.62         | 0.36  | 0.41            | 0.33  | 0.18         | 2.29  | 2.29    |      |
| Fe <sup>3+</sup>                 | 0.74         | 0.76  | 0.93  | 1.31  | 0.67            | 0.89  | 0.00         | 0.00  | 0.34             | 0.39    | 0.73    | 0.67  | 0.99         | 0.29  | 0.77            | 0.35  | 0.38         | 0.74  | 0.74    |      |
| Fe <sup>2+</sup>                 | 1.06         | 1.16  | 1.17  | 1.24  | 0.78            | 1.45  | 2.35         | 2.01  | 0.13             | 0.07    | 0.00    | 0.00  | 0.93         | 1.10  | 0.97            | 1.83  | 1.36         | 0.00  | 0.00    |      |
| Mn                               | 0.03         | 0.04  | 0.04  | 0.03  | 0.05            | 0.03  | 0.06         | 0.06  | 0.01             | 0.01    | 0.02    | 0.00  | 0.03         | 0.05  | 0.05            | 0.06  | 0.06         | 0.02  | 0.02    |      |
| Ni                               | 0.00         | 0.00  | 0.00  | 0.00  | 0.00            | 0.00  | 0.00         | 0.00  | 0.00             | 0.00    | 0.00    | 0.00  | 0.00         | 0.00  | 0.00            | 0.00  | 0.00         | 0.00  | 0.00    |      |
| Mg                               | 2.05         | 1.83  | 2.44  | 1.90  | 3.33            | 2.09  | 2.62         | 3.01  | 0.29             | 0.32    | 0.00    | 0.00  | 2.42         | 3.28  | 2.89            | 2.64  | 3.10         | 0.01  | 0.00    |      |
| Ca                               | 0.13         | 0.05  | 0.74  | 0.30  | 1.29            | 0.68  | 1.76         | 1.82  | 0.39             | 0.43    | 1.95    | 1.96  | 0.40         | 1.44  | 0.97            | 1.69  | 1.57         | 1.92  | 1.98    |      |
| Na                               | 1.87         | 1.94  | 1.26  | 1.69  | 0.68            | 1.26  | 0.31         | 0.22  | 0.60             | 0.59    | 0.00    | 0.00  | 1.58         | 0.63  | 1.03            | 0.33  | 0.43         | 0.00  | 0.00    |      |
| K                                | 0.00         | 0.00  | 0.02  | 0.01  | 0.01            | 0.01  | 0.02         | 0.02  | 0.00             | 0.00    | 0.00    | 0.00  | 0.01         | 0.01  | 0.01            | 0.01  | 0.01         | 0.00  | 0.00    |      |
| F                                | 0.00         | 0.03  | 0.00  | 0.00  | 0.00            | 0.00  | 0.00         | 0.00  | 0.00             | 0.00    | 0.00    | 0.00  | 0.00         | 0.05  | 0.04            | 0.00  | 0.03         | 0.00  | 0.00    |      |
| Total                            | 15.00        | 14.99 | 15.02 | 15.00 | 14.98           | 14.96 | 15.34        | 15.24 | 4.00             | 4.00    | 7.99    | 7.97  | 14.98        | 15.08 | 15.01           | 15.04 | 15.02        | 7.96  | 8.00    |      |
| X <sub>Mg</sub>                  | 0.74         |       | 0.68  | 0.63  | 0.81            | 0.59  | 0.53         | 0.15  | 0.69             | 0.82    |         |       | 0.72         | 0.75  | 0.62            | 0.59  | 0.70         |       |         |      |
| [IV]Al                           | 0.03         |       | 0.11  | 0.07  | 0.12            | 0.07  | 0.05         | 0.10  | 0.00             | 0.01    |         |       | 0.00         | 0.08  | 0.08            | 0.20  | 0.07         |       |         |      |
| [VI]Al                           | 0.50         |       | 0.41  | 0.91  | 0.17            | 0.54  | 0.22         | 0.60  | 0.25             | 0.19    |         |       | 0.62         | 0.28  | 0.33            | 0.12  | 0.1          |       |         |      |
| Quad                             |              |       |       |       |                 |       |              |       | 0.18             | 0.19    |         |       |              |       |                 |       |              |       |         |      |
| Aeg                              |              |       |       |       |                 |       |              |       | 0.34             | 0.39    |         |       |              |       |                 |       |              |       |         |      |
| Jd                               |              |       |       |       |                 |       |              |       | 0.48             | 0.40    |         |       |              |       |                 |       |              |       |         |      |

TABLE S6 Representative mineral analyses from amphibole gneisses (samples OL68A, OL68B and OL61, sites 2 and 3). Fe<sub>2</sub>O<sub>3</sub>\* is the total amount of iron.

|                                  | Chlorite |       |       |          |         | Muscovite |       |       | Epidote |       | Na-Ca amphibole |       | Chlorite |       |       |       | Plagioclase |        |
|----------------------------------|----------|-------|-------|----------|---------|-----------|-------|-------|---------|-------|-----------------|-------|----------|-------|-------|-------|-------------|--------|
|                                  | OL49C    |       | OL49A |          |         | OL49B     |       |       | OL49C   |       | OL42A           |       | OL42A    |       | OL42B |       | OL42A       |        |
|                                  | chl      | chl   | chl   | chl core | chl rim | mu        | mu    | mu    | ep      | ep    | wnc             | wnc   | chl      | chl   | chl   | chl   | ab          | ab     |
| SiO <sub>2</sub>                 | 26.57    | 26.82 | 29.54 | 27.33    | 28.61   | 48.83     | 50.58 | 49.57 | 37.31   | 37.47 | 55.02           | 55.11 | 27.00    | 27.15 | 29.49 | 28.74 | 68.95       | 68.83  |
| TiO <sub>2</sub>                 | 0.02     | 0.02  | 0.02  | 0.01     | <0.01   | 0.07      | 0.04  | 0.06  | 0.07    | 0.25  | 0.07            | <0.01 | <0.01    | <0.01 | <0.01 | <0.01 | <0.01       | <0.01  |
| Al <sub>2</sub> O <sub>3</sub>   | 20.76    | 20.41 | 20.57 | 19.64    | 19.93   | 28.40     | 27.38 | 27.14 | 22.85   | 22.63 | 2.01            | 2.09  | 18.90    | 18.91 | 19.14 | 19.45 | 19.52       | 19.53  |
| Fe <sub>2</sub> O <sub>3</sub> * | 19.39    | 18.70 | 8.45  | 16.42    | 11.60   | 3.04      | 2.74  | 2.76  | 13.35   | 13.39 | 11.63           | 13.64 | 22.30    | 20.70 | 11.27 | 13.62 | 0.01        | 0.03   |
| MnO                              | 0.37     | 0.40  | 0.19  | 0.31     | 0.27    | 0.03      | 0.01  | 0.02  | 0.17    | 0.15  | 0.19            | 0.23  | 0.26     | 0.28  | 0.20  | 0.23  | <0.01       | <0.01  |
| NiO                              | <0.01    | <0.01 | <0.01 | <0.01    | <0.01   | <0.01     | <0.01 | <0.01 | <0.01   | <0.01 | <0.01           | <0.01 | <0.01    | <0.01 | <0.01 | <0.01 | <0.01       | <0.01  |
| MgO                              | 20.89    | 21.12 | 28.50 | 22.81    | 26.43   | 3.32      | 2.87  | 3.66  | 0.01    | 0.03  | 16.52           | 15.52 | 19.82    | 20.74 | 27.55 | 25.72 | <0.01       | <0.01  |
| CaO                              | 0.04     | 0.03  | 0.02  | 0.04     | 0.04    | 0.04      | 0.01  | 0.01  | 23.34   | 23.31 | 9.63            | 10.10 | 0.01     | 0.03  | 0.02  | 0.01  | 0.02        | 0.02   |
| Na <sub>2</sub> O                | 0.03     | <0.01 | 0.01  | 0.01     | 0.01    | 0.20      | 1.43  | 0.16  | <0.01   | 0.01  | 2.02            | 1.88  | 0.01     | 0.03  | <0.01 | <0.01 | 11.75       | 11.79  |
| K <sub>2</sub> O                 | 0.02     | 0.01  | <0.01 | 0.01     | <0.01   | 11.46     | 10.57 | 11.59 | <0.01   | <0.01 | 0.14            | 0.15  | 0.01     | <0.01 | <0.01 | <0.01 | 0.05        | 0.04   |
| F                                | <0.01    | <0.01 | <0.01 | <0.01    | <0.01   | <0.01     | <0.01 | <0.01 | <0.01   | <0.01 | 0.05            | 0.06  | <0.01    | <0.01 | <0.01 | <0.01 | <0.01       | <0.01  |
| Total                            | 88.09    | 87.51 | 87.30 | 86.58    | 86.89   | 95.39     | 95.63 | 94.97 | 97.09   | 97.23 | 97.28           | 98.78 | 88.31    | 87.84 | 87.67 | 87.77 | 100.30      | 100.24 |
| Oxygen                           | 28       | 28    | 28    | 28       | 28      | 11        | 11    | 11    | 12.5    | 12.5  | 13              | 13    | 28       | 28    | 28    | 28    | 8           | 8      |
| Si                               | 5.47     | 5.54  | 5.72  | 5.63     | 5.69    | 3.30      | 3.39  | 3.36  | 3.00    | 3.01  | 7.86            | 7.86  | 5.64     | 5.65  | 5.79  | 5.72  | 3.00        | 3.00   |
| Ti                               | 0.00     | 0.00  | 0.00  | 0.00     | 0.00    | 0.00      | 0.00  | 0.00  | 0.00    | 0.01  | 0.01            | 0.00  | 0.00     | 0.00  | 0.00  | 0.00  | 0.00        | 0.00   |
| Al                               | 5.04     | 4.96  | 4.70  | 4.76     | 4.67    | 2.26      | 2.16  | 2.17  | 2.17    | 2.14  | 0.34            | 0.35  | 4.66     | 4.64  | 4.43  | 4.56  | 1.00        | 1.00   |
| Fe <sup>3+</sup>                 | 0.00     | 0.00  | 0.00  | 0.00     | 0.00    | 0.00      | 0.00  | 0.00  | 0.81    | 0.81  | 0.39            | 0.30  | 0.00     | 0.00  | 0.00  | 0.00  | 0.00        | 0.00   |
| Fe <sup>2+</sup>                 | 3.00     | 2.90  | 1.23  | 2.54     | 1.73    | 0.15      | 0.14  | 0.14  | 0.00    | 0.00  | 0.86            | 1.17  | 3.50     | 3.24  | 1.66  | 2.04  | 0.00        | 0.00   |
| Mn                               | 0.07     | 0.07  | 0.03  | 0.05     | 0.05    | 0.00      | 0.00  | 0.00  | 0.01    | 0.00  | 0.02            | 0.03  | 0.05     | 0.05  | 0.03  | 0.04  | 0.00        | 0.00   |
| Ni                               | 0.00     | 0.00  | 0.00  | 0.00     | 0.00    | 0.00      | 0.00  | 0.00  | 0.00    | 0.00  | 0.00            | 0.00  | 0.00     | 0.00  | 0.00  | 0.00  | 0.00        | 0.00   |
| Mg                               | 6.41     | 6.50  | 8.23  | 7.00     | 7.83    | 0.33      | 0.29  | 0.37  | 0.00    | 0.00  | 3.52            | 3.30  | 6.18     | 6.44  | 8.07  | 7.63  | 0.00        | 0.00   |
| Ca                               | 0.01     | 0.01  | 0.00  | 0.01     | 0.01    | 0.00      | 0.00  | 0.00  | 2.01    | 2.01  | 1.47            | 1.54  | 0.00     | 0.01  | 0.00  | 0.00  | 0.00        | 0.00   |
| Na                               | 0.01     | 0.00  | 0.00  | 0.00     | 0.00    | 0.03      | 0.19  | 0.02  | 0.01    | 0.03  | 0.56            | 0.52  | 0.00     | 0.01  | 0.00  | 0.00  | 0.99        | 1.00   |
| K                                | 0.01     | 0.00  | 0.00  | 0.00     | 0.00    | 0.99      | 0.90  | 1.00  | 0.00    | 0.00  | 0.03            | 0.03  | 0.00     | 0.00  | 0.00  | 0.00  | 0.00        | 0.00   |
| F                                | 0.00     | 0.00  | 0.00  | 0.00     | 0.00    | 0.00      | 0.00  | 0.00  | 0.00    | 0.00  | 0.02            | 0.03  | 0.00     | 0.00  | 0.00  | 0.00  | 0.00        | 0.00   |
| Total                            | 20.02    | 19.98 | 19.93 | 20.00    | 19.98   | 7.08      | 7.07  | 7.06  | 8.01    | 8.01  | 15.06           | 15.09 | 20.03    | 20.03 | 19.99 | 20.00 | 5.00        | 5.00   |
| $X_{Mg}$                         | 0.68     | 0.69  | 0.87  | 0.73     | 0.82    | 0.68      | 0.68  | 0.72  |         |       | 0.80            | 0.74  | 0.64     | 0.67  | 0.83  | 0.79  |             |        |
| [IV]Al                           |          |       |       |          |         |           |       |       |         |       | 0.14            | 0.14  |          |       |       |       |             |        |
| [VI]Al                           |          |       |       |          |         |           |       |       |         |       | 0.20            | 0.21  |          |       |       |       |             |        |

**TABLE S7** Representative mineral analyses from amphibole gneiss (sample OL49C, site 2), metatonalite (sample OL42A, site 6) and chlorite-schist (samples OL49A, OL42B, sites 2 and 6 respectively). Fe<sub>2</sub>O<sub>3</sub>\* is the total amount of iron.



|                                  | Na amphibole |       | Na-Ca amphibole |       | Albite |        | Na amphibole |       | Na-Ca amphibole |       | Ca amphibole |       | Na clinopyroxene |         | Magmatic muscovite |       | Plagioclase |        |
|----------------------------------|--------------|-------|-----------------|-------|--------|--------|--------------|-------|-----------------|-------|--------------|-------|------------------|---------|--------------------|-------|-------------|--------|
|                                  | OL40         |       | OL40            |       | OL40   |        | OL43         |       | OL43            |       | OL43         |       | OL43             |         | OL43               |       | OL43        |        |
|                                  | mrbk         | mrbk  | wnc             | wnc   | ab     | ab     | mrbk         | mrbk  | wnc             | wnc   | act          | act   | aeg-aug          | aeg-aug | mu                 | mu    | ab          | ab     |
| SiO <sub>2</sub>                 | 55.27        | 54.99 | 56.02           | 55.77 | 68.68  | 68.82  | 54.92        | 56.30 | 54.60           | 55.45 | 55.78        | 56.06 | 54.36            | 54.56   | 46.35              | 46.54 | 68.68       | 68.84  |
| TiO <sub>2</sub>                 | 0.06         | 0.04  | 0.00            | 0.02  | 0.00   | 0.00   | 0.05         | 0.03  | 0.04            | 0.02  | 0.05         | 0.07  | 0.06             | 0.08    | 0.61               | 0.69  | 0.00        | 0.00   |
| Al <sub>2</sub> O <sub>3</sub>   | 4.27         | 3.66  | 0.57            | 1.00  | 19.69  | 19.79  | 3.32         | 3.09  | 2.48            | 2.48  | 1.33         | 1.30  | 5.18             | 5.67    | 31.73              | 31.02 | 19.69       | 19.59  |
| Fe <sub>2</sub> O <sub>3</sub> * | 21.79        | 23.64 | 14.88           | 16.23 | <0.01  | 0.04   | 22.66        | 19.65 | 22.47           | 20.25 | 12.28        | 12.58 | 15.73            | 15.57   | 4.67               | 5.06  | <0.01       | <0.01  |
| MnO                              | 0.23         | 0.22  | 0.33            | 0.40  | <0.01  | <0.01  | 0.30         | 0.23  | 0.34            | 0.43  | 0.39         | 0.43  | 0.22             | 0.24    | 0.04               | 0.04  | <0.01       | <0.01  |
| NiO                              | <0.01        | <0.01 | <0.01           | <0.01 | <0.01  | <0.01  | 0.01         | <0.01 | <0.01           | 0.02  | <0.01        | 0.01  | <0.01            | <0.01   | <0.01              | <0.01 | <0.01       | <0.01  |
| MgO                              | 8.89         | 8.52  | 15.44           | 14.58 | <0.01  | <0.01  | 9.11         | 11.06 | 10.07           | 11.31 | 16.39        | 16.32 | 6.11             | 5.80    | 1.16               | 1.28  | <0.01       | <0.01  |
| CaO                              | 1.36         | 1.49  | 9.39            | 7.60  | 0.19   | 0.21   | 3.03         | 2.59  | 4.78            | 4.93  | 11.82        | 12.24 | 10.82            | 10.40   | <0.01              | <0.01 | 0.19        | <0.01  |
| Na <sub>2</sub> O                | 6.44         | 6.37  | 1.95            | 3.05  | 11.42  | 11.61  | 5.43         | 5.89  | 4.41            | 4.41  | 0.68         | 0.50  | 8.07             | 8.37    | 0.21               | 0.24  | 11.42       | 11.72  |
| K <sub>2</sub> O                 | 0.03         | 0.04  | 0.04            | 0.06  | 0.09   | 0.07   | 0.06         | 0.05  | 0.07            | 0.07  | 0.05         | 0.04  | 0.03             | <0.01   | 11.33              | 11.47 | 0.09        | 0.05   |
| F                                | <0.01        | <0.01 | 0.01            | 0.02  | <0.01  | <0.01  | 0.01         | <0.01 | 0.01            | <0.01 | <0.01        | <0.01 | <0.01            | <0.01   | <0.01              | <0.01 | <0.01       | <0.01  |
| Total                            | 98.34        | 98.97 | 98.63           | 98.73 | 100.07 | 100.54 | 98.90        | 98.89 | 99.27           | 99.37 | 98.77        | 99.55 | 100.58           | 100.69  | 96.10              | 96.34 | 100.07      | 100.20 |
| Oxygen                           | 13           | 13    | 13              | 13    | 8      | 8      | 13           | 13    | 13              | 13    | 13           | 13    | 6                | 6       | 11                 | 11    | 8           | 8      |
| Si                               | 7.96         | 7.94  | 7.99            | 7.95  | 2.99   | 2.99   | 7.95         | 8.00  | 7.91            | 7.93  | 7.94         | 7.94  | 2.00             | 2.00    | 3.14               | 3.16  | 2.99        | 3.00   |
| Ti                               | 0.01         | 0.00  | 0.00            | 0.00  | 0.00   | 0.00   | 0.01         | 0.00  | 0.00            | 0.00  | 0.01         | 0.01  | 0.00             | 0.00    | 0.03               | 0.04  | 0.00        | 0.00   |
| Al                               | 0.73         | 0.62  | 0.10            | 0.17  | 1.01   | 1.01   | 0.57         | 0.52  | 0.42            | 0.42  | 0.22         | 0.22  | 0.22             | 0.24    | 2.53               | 2.48  | 1.01        | 1.01   |
| Fe <sup>3+</sup>                 | 1.11         | 1.23  | 0.51            | 0.76  | 0.00   | 0.00   | 1.04         | 1.04  | 1.02            | 0.96  | 0.10         | 0.03  | 0.36             | 0.35    | 0.00               | 0.00  | 0.00        | 0.00   |
| Fe <sup>2+</sup>                 | 1.25         | 1.34  | 1.08            | 0.98  | 0.00   | 0.00   | 1.43         | 1.06  | 1.43            | 1.22  | 1.22         | 1.31  | 0.08             | 0.08    | 0.24               | 0.26  | 0.00        | 0.00   |
| Mn                               | 0.03         | 0.03  | 0.04            | 0.05  | 0.00   | 0.00   | 0.04         | 0.03  | 0.04            | 0.05  | 0.05         | 0.05  | 0.01             | 0.01    | 0.00               | 0.00  | 0.00        | 0.00   |
| Ni                               | 0.00         | 0.00  | 0.00            | 0.00  | 0.00   | 0.00   | 0.00         | 0.00  | 0.00            | 0.00  | 0.00         | 0.00  | 0.00             | 0.00    | 0.00               | 0.00  | 0.00        | 0.00   |
| Mg                               | 1.91         | 1.83  | 3.28            | 3.10  | 0.00   | 0.00   | 1.97         | 2.34  | 2.17            | 2.41  | 3.48         | 3.44  | 0.33             | 0.32    | 0.12               | 0.13  | 0.00        | 0.00   |
| Ca                               | 0.21         | 0.23  | 1.43            | 1.16  | 0.01   | 0.01   | 0.47         | 0.39  | 0.74            | 0.76  | 1.80         | 1.86  | 0.43             | 0.41    | 0.00               | 0.00  | 0.01        | 0.00   |
| Na                               | 1.80         | 1.78  | 0.51            | 0.85  | 0.97   | 0.98   | 1.52         | 1.62  | 1.24            | 1.22  | 0.19         | 0.14  | 0.57             | 0.59    | 0.03               | 0.03  | 0.97        | 0.99   |
| K                                | 0.01         | 0.01  | 0.01            | 0.01  | 0.01   | 0.00   | 0.01         | 0.01  | 0.01            | 0.01  | 0.01         | 0.01  | 0.00             | 0.00    | 0.98               | 0.99  | 0.01        | 0.00   |
| F                                | 0.00         | 0.00  | 0.00            | 0.01  | 0.00   | 0.00   | 0.00         | 0.00  | 0.01            | 0.00  | 0.00         | 0.00  | 0.00             | 0.00    | 0.00               | 0.00  | 0.00        | 0.00   |
| Total                            | 15.01        | 15.02 | 14.98           | 15.01 | 4.99   | 5.00   | 15.01        | 15.03 | 14.99           | 14.99 | 15.00        | 15.00 | 4.00             | 4.00    | 7.07               | 7.08  | 4.99        | 5.00   |
| $X_{Mg}$                         | 0.6          | 0.58  | 0.75            | 0.05  |        |        | 0.58         | 0.69  | 0.60            | 0.66  | 0.74         | 0.73  | 0.81             | 0.80    | 0.33               | 0.33  |             |        |
| [IV]Al                           | 0.04         | 0.06  | 0.01            | 0.11  |        |        | 0.05         | 0.00  | 0.09            | 0.07  | 0.06         | 0.06  | 0.00             | 0.00    |                    |       |             |        |
| [VI]Al                           | 0.69         | 0.57  | 0.08            | 0.76  |        |        | 0.52         | 0.52  | 0.33            | 0.35  | 0.16         | 0.15  | 0.22             | 0.24    |                    |       |             |        |
|                                  |              |       |                 |       |        |        |              |       |                 |       |              |       | Quad             | 0.42    | 0.40               |       |             |        |
|                                  |              |       |                 |       |        |        |              |       |                 |       |              |       | Aeg              | 0.36    | 0.35               |       |             |        |
|                                  |              |       |                 |       |        |        |              |       |                 |       |              |       | Jd               | 0.22    | 0.24               |       |             |        |

**TABLE S8** Representative mineral analyses from metatonalite (samples OL40 and OL43, site 6). Fe<sub>2</sub>O<sub>3</sub>\* is the total amount of iron.

|                                  | Na amphibole |       | Na-Ca amphibole |       | Na clinopyroxene |         | Epidote |       | Plagioclase |        | Epidote |       |       | Chlorite |       | Muscovite |       | Albite |       |
|----------------------------------|--------------|-------|-----------------|-------|------------------|---------|---------|-------|-------------|--------|---------|-------|-------|----------|-------|-----------|-------|--------|-------|
|                                  | OL44         |       | OL44            |       | OL44             |         | OL44    |       | OL44        |        | OL1424  |       |       | OL1424   |       | OL1424    |       | OL1424 |       |
|                                  | mrbk         | mrbk  | wnc             | wnc   | aeg-augaeg-aug   | ep core | ep rim  | ab    | ab          | zo     | zo      | zo    | chl   | chl      | mu    | mu        | ab    | ab     |       |
| SiO <sub>2</sub>                 | 55.17        | 55.04 | 55.48           | 55.98 | 54.02            | 54.31   | 38.05   | 37.80 | 68.73       | 68.77  | 39.54   | 39.59 | 39.56 | 28.85    | 28.27 | 51.53     | 49.93 | 67.91  | 68.39 |
| TiO <sub>2</sub>                 | 0.06         | 0.05  | 0.07            | 0.10  | 0.10             | 0.10    | 0.03    | 0.10  | <0.01       | <0.01  | 0.09    | 0.03  | <0.01 | <0.01    | 0.03  | 0.02      | 0.04  | 0.01   | <0.01 |
| Al <sub>2</sub> O <sub>3</sub>   | 3.73         | 4.68  | 3.87            | 3.30  | 4.41             | 5.29    | 27.13   | 24.50 | 19.71       | 19.66  | 34.15   | 34.10 | 33.66 | 21.85    | 22.55 | 27.59     | 32.41 | 19.30  | 19.75 |
| Fe <sub>2</sub> O <sub>3</sub> * | 21.46        | 22.47 | 22.07           | 20.02 | 15.97            | 14.87   | 8.06    | 11.16 | 0.07        | <0.01  | 0.23    | 0.48  | 0.82  | 11.85    | 8.81  | 1.10      | 0.64  | <0.01  | 0.01  |
| MnO                              | 0.23         | 0.21  | 0.24            | 0.26  | 0.21             | 0.26    | 0.01    | 0.25  | <0.01       | <0.01  | <0.01   | <0.01 | 0.01  | 0.08     | 0.07  | <0.01     | 0.01  | 0.01   | 0.02  |
| NiO                              | <0.01        | 0.03  | <0.01           | 0.03  | <0.01            | <0.01   | <0.01   | <0.01 | <0.01       | <0.01  | <0.01   | <0.01 | <0.01 | <0.01    | <0.01 | <0.01     | <0.01 | <0.01  | <0.01 |
| MgO                              | 9.39         | 8.57  | 9.42            | 10.81 | 6.50             | 6.72    | 0.02    | 0.03  | <0.01       | <0.01  | <0.01   | <0.01 | 0.01  | 26.30    | 27.29 | 3.87      | 2.67  | <0.01  | <0.01 |
| CaO                              | 3.03         | 1.83  | 2.91            | 3.28  | 12.42            | 12.13   | 23.83   | 23.70 | 0.19        | 0.16   | 24.94   | 24.90 | 24.85 | 0.02     | 0.04  | 0.01      | 0.01  | 0.13   | 0.32  |
| Na <sub>2</sub> O                | 5.57         | 6.13  | 5.36            | 5.22  | 7.12             | 7.23    | 0.01    | 0.01  | 11.70       | 11.61  | 0.02    | 0.01  | 0.02  | 0.01     | <0.01 | 0.23      | 0.31  | 11.46  | 11.42 |
| K <sub>2</sub> O                 | 0.07         | 0.04  | 0.06            | 0.07  | 0.02             | 0.01    | <0.01   | <0.01 | 0.06        | 0.06   | <0.01   | <0.01 | <0.01 | 0.04     | <0.01 | 10.84     | 10.55 | 0.04   | 0.03  |
| F                                | <0.01        | <0.01 | <0.01           | <0.01 | <0.01            | <0.01   | <0.01   | <0.01 | <0.01       | <0.01  | <0.01   | <0.01 | <0.01 | <0.01    | <0.01 | <0.01     | <0.01 | <0.01  | <0.01 |
| Total                            | 98.71        | 99.05 | 99.48           | 99.07 | 100.77           | 100.92  | 97.15   | 97.55 | 100.46      | 100.26 | 98.97   | 99.10 | 98.93 | 88.99    | 87.05 | 95.19     | 96.57 | 98.87  | 99.94 |
| Oxygen                           | 13           | 13    | 13              | 13    | 6                | 6       | 12.5    | 12.5  | 8           | 8      | 12.5    | 12.5  | 12.5  | 28       | 28    | 11        | 11    | 8      | 8     |
| Si                               | 7.97         | 7.91  | 7.93            | 7.97  | 1.99             | 1.99    | 2.99    | 3.00  | 2.99        | 2.99   | 2.96    | 2.97  | 2.97  | 5.59     | 5.50  | 3.42      | 3.26  | 3.00   | 2.99  |
| Ti                               | 0.01         | 0.01  | 0.01            | 0.01  | 0.00             | 0.00    | 0.00    | 0.01  | 0.00        | 0.00   | 0.00    | 0.00  | 0.00  | 0.00     | 0.00  | 0.00      | 0.00  | 0.00   | 0.00  |
| Al                               | 0.64         | 0.79  | 0.65            | 0.55  | 0.19             | 0.23    | 2.52    | 2.29  | 1.01        | 1.01   | 3.00    | 2.99  | 2.98  | 4.99     | 5.17  | 2.16      | 2.49  | 1.00   | 1.02  |
| Fe <sup>3+</sup>                 | 0.89         | 1.10  | 1.09            | 1.04  | 0.32             | 0.30    | 0.48    | 0.67  | 0.00        | 0.00   | 0.03    | 0.05  | 0.05  | 0.00     | 0.00  | 0.00      | 0.00  | 0.00   | 0.00  |
| Fe <sup>2+</sup>                 | 1.44         | 1.33  | 1.29            | 1.10  | 0.12             | 0.11    | 0.00    | 0.00  | 0.00        | 0.00   | 0.00    | 0.00  | 0.00  | 1.73     | 1.29  | 0.06      | 0.03  | 0.00   | 0.00  |
| Mn                               | 0.03         | 0.03  | 0.03            | 0.03  | 0.01             | 0.01    | 0.00    | 0.02  | 0.00        | 0.00   | 0.00    | 0.00  | 0.00  | 0.01     | 0.01  | 0.00      | 0.00  | 0.00   | 0.00  |
| Ni                               | 0.00         | 0.00  | 0.00            | 0.00  | 0.00             | 0.00    | 0.00    | 0.00  | 0.00        | 0.00   | 0.00    | 0.00  | 0.00  | 0.00     | 0.00  | 0.00      | 0.00  | 0.00   | 0.00  |
| Mg                               | 2.02         | 1.84  | 2.01            | 2.29  | 0.36             | 0.37    | 0.00    | 0.00  | 0.00        | 0.00   | 0.00    | 0.00  | 0.00  | 7.59     | 7.92  | 0.38      | 0.26  | 0.00   | 0.00  |
| Ca                               | 0.47         | 0.28  | 0.45            | 0.50  | 0.49             | 0.48    | 2.01    | 2.01  | 0.01        | 0.01   | 2.00    | 2.00  | 2.00  | 0.00     | 0.01  | 0.00      | 0.00  | 0.01   | 0.15  |
| Na                               | 1.56         | 1.71  | 1.49            | 1.44  | 0.51             | 0.51    | 0.02    | 0.02  | 0.99        | 0.98   | 0.00    | 0.00  | 0.03  | 0.00     | 0.00  | 0.03      | 0.04  | 0.98   | 0.97  |
| K                                | 0.01         | 0.01  | 0.01            | 0.01  | 0.00             | 0.00    | 0.00    | 0.00  | 0.00        | 0.00   | 0.00    | 0.00  | 0.00  | 0.01     | 0.00  | 0.92      | 0.88  | 0.00   | 0.00  |
| F                                | 0.00         | 0.00  | 0.00            | 0.00  | 0.00             | 0.00    | 0.00    | 0.00  | 0.00        | 0.00   | 0.00    | 0.00  | 0.00  | 0.00     | 0.00  | 0.00      | 0.00  | 0.00   | 0.00  |
| Total                            | 15.04        | 15.00 | 14.94           | 14.95 | 4.00             | 4.00    | 8.02    | 8.02  | 5.00        | 4.99   | 7.99    | 8.00  | 8.02  | 19.92    | 19.91 | 6.97      | 6.96  | 4.99   | 4.99  |
| X <sub>Mg</sub>                  | 0.58         | 0.58  | 0.61            | 0.68  | 0.75             | 0.76    |         |       |             |        |         |       |       | 0.81     | 0.86  | 0.87      | 0.89  |        |       |
| [IV]Al                           | 0.03         | 0.09  | 0.07            | 0.03  | 0.01             | 0.01    |         |       |             |        |         |       |       | 2.41     | 2.50  |           |       |        |       |
| [VI]Al                           | 0.61         | 0.70  | 0.58            | 0.52  | 0.19             | 0.22    |         |       |             |        |         |       |       | 2.58     | 2.68  |           |       |        |       |
| Quad                             |              |       |                 |       | 0.48             | 0.48    |         |       |             |        |         |       |       |          |       |           |       |        |       |
| Aeg                              |              |       |                 |       | 0.32             | 0.29    |         |       |             |        |         |       |       |          |       |           |       |        |       |
| Jd                               |              |       |                 |       | 0.19             | 0.22    |         |       |             |        |         |       |       |          |       |           |       |        |       |

**TABLE S9** Representative mineral analyses from a metatonalite (sample OL44, site 6) and a leucocratic metagabbro (OL1424, site 4). Fe<sub>2</sub>O<sub>3</sub>\* is the total amount of iron.

|                                  | Na amphibole |       |       |       | Muscovite |       | Chlorite |       | Epidote |       | Garnet |       |
|----------------------------------|--------------|-------|-------|-------|-----------|-------|----------|-------|---------|-------|--------|-------|
|                                  | VP7          |       |       |       | VP7       |       | VP7      |       | VP7     |       | VP7    |       |
|                                  | gl           | gl    | mrbk  | mrbk  | mu        | mu    | chl      | chl   | ep      | ep    | g      | g     |
| SiO <sub>2</sub>                 | 54.80        | 54.34 | 53.95 | 53.74 | 49.27     | 49.44 | 25.45    | 26.45 | 37.95   | 37.51 | 36.63  | 36.20 |
| TiO <sub>2</sub>                 | 0.07         | 0.04  | 0.03  | 0.01  | 0.08      | 0.09  | 0.02     | 0.14  | 0.06    | 0.06  | 0.10   | 0.11  |
| Al <sub>2</sub> O <sub>3</sub>   | 5.73         | 6.00  | 5.73  | 4.58  | 25.51     | 26.11 | 19.35    | 19.21 | 26.56   | 23.66 | 20.78  | 20.32 |
| Fe <sub>2</sub> O <sub>3</sub> * | 21.96        | 22.34 | 23.15 | 22.30 | 5.56      | 5.02  | 28.24    | 26.94 | 8.99    | 12.43 | 11.54  | 11.30 |
| MnO                              | 0.33         | 0.35  | 0.37  | 0.46  | 0.06      | 0.05  | 0.96     | 0.83  | 0.13    | 0.06  | 22.77  | 22.89 |
| NiO                              | <0.01        | 0.03  | <0.01 | 0.02  | <0.01     | <0.01 | <0.01    | <0.01 | <0.01   | <0.01 | <0.01  | <0.01 |
| MgO                              | 7.25         | 7.00  | 6.79  | 8.41  | 2.86      | 2.93  | 14.24    | 13.74 | 0.01    | 0.01  | 0.19   | 0.17  |
| CaO                              | 0.50         | 0.69  | 0.92  | 1.68  | 0.01      | <0.01 | 0.03     | 0.09  | 23.94   | 23.60 | 8.65   | 8.65  |
| Na <sub>2</sub> O                | 6.86         | 6.83  | 6.62  | 6.13  | 0.21      | 0.24  | 0.03     | 0.02  | <0.01   | 0.01  | <0.01  | <0.01 |
| K <sub>2</sub> O                 | <0.01        | 0.04  | 0.06  | 0.07  | 11.24     | 11.22 | 0.02     | 0.71  | <0.01   | <0.01 | <0.01  | <0.01 |
| F                                | 0.04         | 0.06  | 0.04  | 0.05  | <0.01     | <0.01 | <0.01    | <0.01 | <0.01   | <0.01 | <0.01  | <0.01 |
| Total                            | 97.54        | 97.70 | 97.66 | 97.45 | 94.80     | 95.11 | 88.34    | 88.13 | 97.64   | 97.33 | 100.65 | 99.64 |
| Oxygen                           | 13           | 13    | 13    | 13    | 11        | 11    | 28       | 28    | 12.5    | 12.5  | 12     | 12    |
| Si                               | 7.98         | 7.94  | 7.92  | 7.86  | 3.39      | 3.38  | 5.55     | 5.74  | 2.97    | 2.97  | 2.97   | 2.97  |
| Ti                               | 0.01         | 0.00  | 0.00  | 0.00  | 0.00      | 0.00  | 0.00     | 0.02  | 0.00    | 0.00  | 0.01   | 0.01  |
| Al                               | 0.98         | 1.03  | 0.99  | 0.79  | 2.07      | 2.11  | 4.97     | 4.91  | 2.08    | 2.20  | 1.99   | 1.96  |
| Fe <sup>3+</sup>                 | 0.93         | 0.93  | 0.98  | 1.21  | 0.00      | 0.00  | 0.00     | 0.00  | 0.96    | 0.82  | 0.07   | 0.09  |
| Fe <sup>2+</sup>                 | 1.48         | 1.53  | 1.57  | 1.25  | 0.29      | 0.26  | 4.63     | 4.40  | 0.00    | 0.00  | 0.64   | 0.60  |
| Mn                               | 0.04         | 0.04  | 0.05  | 0.06  | 0.00      | 0.00  | 0.18     | 0.15  | 0.05    | 0.00  | 1.56   | 1.59  |
| Ni                               | 0.00         | 0.00  | 0.00  | 0.00  | 0.00      | 0.00  | 0.00     | 0.00  | 0.00    | 0.00  | 0.00   | 0.00  |
| Mg                               | 1.57         | 1.52  | 1.49  | 1.83  | 0.29      | 0.30  | 4.63     | 4.44  | 0.00    | 0.00  | 0.02   | 0.02  |
| Ca                               | 0.08         | 0.11  | 0.14  | 0.26  | 0.00      | 0.00  | 0.01     | 0.02  | 1.94    | 2.00  | 0.75   | 0.76  |
| Na                               | 1.94         | 1.93  | 1.88  | 1.74  | 0.03      | 0.03  | 0.01     | 0.01  | 0.00    | 0.00  | 0.00   | 0.00  |
| K                                | 0.00         | 0.01  | 0.01  | 0.01  | 0.99      | 0.98  | 0.01     | 0.20  | 0.00    | 0.00  | 0.00   | 0.00  |
| F                                | 0.00         | 0.03  | 0.02  | 0.02  | 0.00      | 0.00  | 0.00     | 0.00  | 0.00    | 0.00  | 0.00   | 0.00  |
| Total                            | 15.01        | 15.05 | 15.04 | 15.01 | 7.06      | 7.06  | 19.98    | 19.89 | 8.00    | 7.99  | 8.00   | 8.00  |
| X <sub>Mg</sub>                  | 0.52         | 0.50  | 0.49  | 0.59  | 0.50      | 0.54  | 0.50     | 0.50  |         | py    | 1      | 1     |
| [IV]Al                           | 0.02         | 0.06  | 0.08  | 0.14  |           |       |          | 2.26  |         | alm   | 21     | 20    |
| [VI]Al                           | 0.97         | 0.97  | 0.91  | 0.65  |           |       |          | 2.65  |         | grs   | 22     | 21    |
|                                  |              |       |       |       |           |       |          |       |         | spss  | 53     | 53    |
|                                  |              |       |       |       |           |       |          |       |         | andr  | 3      | 5     |

**TABLE S10** Representative mineral analyses from blueschist (sample VP7, site 7). Fe<sub>2</sub>O<sub>3</sub>\* is the total amount of iron.

| Rock type                        | Site 1       |       |       |                      |                       |       | Site 2    |        |        |               |                 |                     |        |       |        |
|----------------------------------|--------------|-------|-------|----------------------|-----------------------|-------|-----------|--------|--------|---------------|-----------------|---------------------|--------|-------|--------|
|                                  | Hornblendite |       |       | Foliated orthogneiss | Mylonitic orthogneiss |       | Am-gneiss |        |        | Mu-rich layer | Chlorite-schist | Ultramafic cumulate |        |       |        |
|                                  | Sample       | OL02  | OL03  | OL04                 | OL25                  | OL24  | OL23      | OL50   | OL68B  | OL68A         | OL49C           | OL49B               | OL49A  | OL35  | OL34   |
| SiO <sub>2</sub>                 | 42.08        | 36.41 | 37.56 | 71.19                | 61.75                 | 64.81 | 72.39     | 62.06  | 59.67  | 62.63         | 44.56           | 28.78               | 43.69  | 51.36 | 39.82  |
| Al <sub>2</sub> O <sub>3</sub>   | 17.52        | 16.30 | 12.00 | 14.66                | 17.65                 | 16.65 | 14.21     | 17.22  | 18.01  | 19.48         | 21.56           | 19.93               | 2.16   | 1.63  | 10.16  |
| Fe <sub>2</sub> O <sub>3</sub> * | 13.01        | 18.27 | 21.92 | 2.72                 | 5.11                  | 4.04  | 2.78      | 4.92   | 5.52   | 2.00          | 6.92            | 10.92               | 16.29  | 10.60 | 9.04   |
| MnO                              | 0.12         | 0.14  | 0.15  | 0.05                 | 0.09                  | 0.08  | 0.05      | 0.08   | 0.09   | 0.04          | 0.18            | 0.30                | 0.15   | 0.07  | 0.10   |
| MgO                              | 7.49         | 6.52  | 9.01  | 0.97                 | 1.68                  | 1.47  | 0.50      | 1.37   | 1.75   | 1.08          | 12.07           | 25.92               | 29.90  | 29.32 | 28.55  |
| CaO                              | 11.38        | 14.72 | 10.45 | 0.62                 | 2.77                  | 2.76  | 2.88      | 4.81   | 4.12   | 2.01          | 2.14            | 1.46                | 0.05   | bdl   | 4.08   |
| Na <sub>2</sub> O                | 1.88         | 0.39  | 0.72  | 5.24                 | 6.85                  | 6.35  | 6.32      | 8.56   | 8.04   | 9.97          | 3.54            | bdl                 | bdl    | bdl   | 0.05   |
| K <sub>2</sub> O                 | 0.73         | bdl   | bdl   | 2.54                 | 1.18                  | 1.12  | 0.39      | 0.03   | 0.33   | 0.41          | 2.18            | bdl                 | bdl    | bdl   | bdl    |
| TiO <sub>2</sub>                 | 0.99         | 1.99  | 2.34  | 0.33                 | 0.63                  | 0.48  | 0.28      | 0.63   | 0.71   | 0.45          | 0.72            | 1.05                | 0.05   | bdl   | 0.03   |
| P <sub>2</sub> O <sub>5</sub>    | bdl          | bdl   | bdl   | bdl                  | 0.17                  | 0.12  | bdl       | 0.16   | 0.18   | 0.12          | 0.17            | 0.25                | bdl    | bdl   | bdl    |
| LOI                              | 3.79         | 3.98  | 5.48  | 1.20                 | 2.13                  | 1.65  | 0.88      | 0.75   | 1.60   | 1.24          | 6.39            | 11.26               | 8.21   | 6.51  | 8.45   |
| Total                            | 98.98        | 98.72 | 99.63 | 99.52                | 100.01                | 99.53 | 100.68    | 100.58 | 100.02 | 99.42         | 100.42          | 99.86               | 100.51 | 99.48 | 100.27 |
| FeO                              | 6.50         | 7.52  | 9.95  | 0.81                 | 1.82                  | 1.57  | 0.67      | 0.61   | 0.45   | 0.73          | 4.47            | 8.94                | 6.93   | 5.02  | 5.46   |
| Fe <sup>3</sup> /Fe*             | 0.29         | 0.37  | 0.33  | 0.50                 | 0.40                  | 0.43  | 0.82      | 0.78   | 0.65   | 0.42          | 0.16            | 0.05                | 0.36   | 0.31  | 0.20   |
| Mg#                              | 67           | 61    | 62    | 68                   | 62                    | 63    | 64        | 70     | 63     | 72            | 83              | 84                  | 88     | 91    | 90     |

**TABLE S11:** Bulk geochemical data of the studied samples from the DBTS. Major elements reported in oxide wt.%. Mg# and ratio Fe<sup>3</sup>/Fe\* are reported in molar percent. Fe<sub>2</sub>O<sub>3</sub>\* is the total amount of iron. LOI = loss on ignition.

|                                  | Site 4                 | Site 5      | Site 3    |       | Site 5 |        | Site 4 | Site 5 | Site 6                    |              |        |        |                     |                        | Site 7 | Diehl et al.<br>1952 |             |       |
|----------------------------------|------------------------|-------------|-----------|-------|--------|--------|--------|--------|---------------------------|--------------|--------|--------|---------------------|------------------------|--------|----------------------|-------------|-------|
| Rock type                        | Ultramafic<br>cumulate | Orthogneiss | Am-gneiss |       |        |        |        |        | Leucocratic<br>metagabbro | Metatonalite |        |        | Chlorite-<br>schist | Ultramafic<br>cumulate |        | Blueschist           | Orthogneiss |       |
| Sample                           | OL60                   | OL08        | OL61      | OL62  | OL63   | OL06   | OL21A  | OL21B  | OL1424                    | OL39         | OL40   | OL43   | OL42A               | OL42B                  | OL54   | OL55                 | VP7         | 14    |
| SiO <sub>2</sub>                 | 38.88                  | 68.20       | 70.72     | 72.42 | 55.89  | 66.99  | 76.35  | 70.77  | 45.45                     | 68.79        | 72.01  | 72.61  | 60.50               | 29.23                  | 37.34  | 42.09                | 57.92       | 65.51 |
| Al <sub>2</sub> O <sub>3</sub>   | 5.77                   | 15.85       | 14.58     | 13.60 | 18.37  | 17.87  | 13.45  | 13.83  | 28.66                     | 15.62        | 14.41  | 14.39  | 19.19               | 18.66                  | 2.32   | 1.08                 | 15.38       | 15.82 |
| Fe <sub>2</sub> O <sub>3</sub> * | 10.02                  | 3.62        | 2.86      | 2.22  | 6.13   | 1.70   | 0.57   | 2.57   | 0.97                      | 2.45         | 1.99   | 1.61   | 3.26                | 13.59                  | 13.12  | 6.19                 | 9.09        | 4.61  |
| MnO                              | 0.12                   | 0.07        | 0.05      | 0.04  | 0.11   | 0.02   | bdl    | 0.05   | 0.02                      | 0.03         | 0.02   | 0.03   | 0.06                | 0.29                   | 0.13   | 0.19                 | 0.18        | 0.13  |
| MgO                              | 33.11                  | 1.41        | 0.74      | 0.58  | 2.32   | 1.10   | 0.23   | 0.80   | 1.99                      | 1.57         | 1.18   | 1.07   | 4.27                | 25.95                  | 34.47  | 38.11                | 2.61        | 1.49  |
| CaO                              | 0.40                   | 1.99        | 2.92      | 2.13  | 6.55   | 0.61   | 0.47   | 3.18   | 16.41                     | 1.01         | 0.56   | 0.74   | 0.48                | 0.57                   | 0.05   | bdl                  | 3.84        | 3.00  |
| Na <sub>2</sub> O                | bdl                    | 4.83        | 7.62      | 6.83  | 7.36   | 10.74  | 8.01   | 7.13   | 2.14                      | 9.71         | 9.05   | 8.76   | 9.63                | 0.02                   | bdl    | bdl                  | 2.76        | 4.06  |
| K <sub>2</sub> O                 | bdl                    | 2.35        | 0.03      | 0.39  | 0.04   | 0.05   | 0.04   | 0.04   | 0.69                      | 0.07         | 0.04   | 0.09   | bdl                 | bdl                    | bdl    | bdl                  | 3.65        | 2.83  |
| TiO <sub>2</sub>                 | 0.06                   | 0.47        | 0.31      | 0.25  | 0.79   | 0.24   | 0.07   | 0.36   | 0.06                      | 0.29         | 0.29   | 0.18   | 0.41                | 0.48                   | 0.08   | 0.02                 | 1.39        | 1.23  |
| P <sub>2</sub> O <sub>5</sub>    | bdl                    | 0.15        | bdl       | bdl   | 0.21   | bdl    | bdl    | bdl    | bdl                       | bdl          | bdl    | bdl    | bdl                 | 0.16                   | bdl    | bdl                  | 0.48        | 0.02  |
| LOI                              | 11.11                  | 1.71        | 0.70      | 0.79  | 1.64   | 0.78   | 0.35   | 0.75   | 2.38                      | 0.45         | 0.56   | 0.81   | 2.28                | 11.13                  | 11.57  | 12.05                | 2.96        | 1.40  |
| Total                            | 99.46                  | 100.64      | 100.52    | 99.24 | 99.40  | 100.09 | 99.53  | 99.47  | 98.76                     | 99.97        | 100.11 | 100.28 | 100.08              | 100.08                 | 99.06  | 99.73                | 100.27      | 99.88 |
| FeO                              | 4.60                   | 1.86        | 0.51      | 0.41  | 1.36   | 0.62   | 0.12   | 0.45   | 0.61                      | 1.21         | 0.77   | 0.84   | 2.54                | 11.6                   | 5.09   | 4.16                 | 2.79        | 2.49  |
| Fe <sup>3</sup> /Fe*             | 0.32                   | 0.27        | 0.67      | 0.66  | 0.70   | 0.42   | 0.62   | 0.67   | 0.18                      | 0.29         | 0.40   | 0.27   | 0.07                | 0.03                   | 0.40   | 0.15                 | 0.49        | 0.26  |
| Mg#                              | 93                     | 57          | 72        | 71    | 75     | 76     | 77     | 76     | 85                        | 70           | 73     | 69     | 75                  | 80                     | 92     | 94                   | 63          | 52    |

**TABLE S12:** Bulk geochemical data of the studied samples from the DBTS. Major elements reported in oxide wt.%. Mg# and ratio Fe<sup>3</sup>/Fe\* are reported in molar percent. Fe<sub>2</sub>O<sub>3</sub>\* is the total amount of iron. LOI = loss on ignition.

| Rock type                   | Site 1       |      |      | Site 2               |                       |      |      |       |           |       |       |               |                 |                     |      |      |
|-----------------------------|--------------|------|------|----------------------|-----------------------|------|------|-------|-----------|-------|-------|---------------|-----------------|---------------------|------|------|
|                             | Hornblendite |      |      | Foliated orthogneiss | Mylonitic orthogneiss |      |      |       | Am-gneiss |       |       | Mu-rich layer | Chlorite-schist | Ultramafic cumulate |      |      |
|                             | Sample       | OL02 | OL03 | OL04                 | OL25                  | OL24 | OL23 | OL50  | OL68B     | OL68A | OL49C | OL49B         | OL49A           | OL35                | OL34 | OL33 |
| <i>Trace elements (ppm)</i> |              |      |      |                      |                       |      |      |       |           |       |       |               |                 |                     |      |      |
| As                          | bdl          | 1.51 | 1.91 | bdl                  | bdl                   | bdl  | bdl  | bdl   | bdl       | bdl   | bdl   | bdl           | bdl             | bdl                 | bdl  | bdl  |
| Ba                          | 217          | 22   | 11   | 401                  | 165                   | 227  | 47   | 3.80  | 44        | 49    | 283   | bdl           | bdl             | bdl                 | bdl  | bdl  |
| Be                          | 0.42         | 0.47 | 0.59 | 2.71                 | 2.41                  | 2.43 | 1.37 | 2.13  | 2.00      | 0.53  | 1.04  | 0.43          | 0.34            | 0.13                | 0.37 | 0.37 |
| Bi                          | bdl          | bdl  | 0.07 | 0.09                 | 0.05                  | 0.10 | bdl  | bdl   | bdl       | 0.07  | bdl   | bdl           | 0.06            | bdl                 | bdl  | bdl  |
| Cd                          | 0.07         | 0.11 | 0.05 | 0.04                 | 0.07                  | 0.07 | 0.04 | 0.22  | 0.20      | 0.05  | 0.06  | 0.07          | 0.03            | 0.04                | 0.06 | 0.06 |
| Co                          | 38           | 66   | 92   | 5.91                 | 5.70                  | 4.91 | 1.12 | 4.68  | 4.27      | 3.10  | 12    | 19            | 153             | 83                  | 100  | 100  |
| Cr                          | 103          | 45   | 15   | 5.43                 | 3.78                  | 3.79 | 3.73 | bdl   | bdl       | 5.54  | 6.14  | 6.36          | 5735            | 1943                | 2318 | 2318 |
| Cs                          | 0.15         | 0.04 | 0.08 | 0.81                 | 0.47                  | 0.37 | 0.14 | bdl   | 0.10      | 0.12  | 0.68  | 0.04          | 0.18            | 0.15                | 0.25 | 0.25 |
| Cu                          | 39           | 87   | 61   | bdl                  | 18                    | 4.54 | 3.21 | bdl   | 8.85      | 6.48  | 12    | 9.57          | 50              | 65                  | 27   | 27   |
| Ga                          | 21           | 26   | 21   | 19                   | 21                    | 20   | 18   | 23    | 23        | 18    | 21    | 17            | 3.98            | 2.34                | 7.75 | 7.75 |
| Ge                          | 1.12         | 1.76 | 1.26 | 1.24                 | 1.11                  | 1.26 | 1.05 | 1.50  | 1.36      | 0.67  | 0.83  | 0.76          | 0.82            | 0.97                | 0.82 | 0.82 |
| Hf                          | 0.57         | 0.69 | 0.98 | 5.20                 | 7.10                  | 5.22 | 4.03 | 7.51  | 7.72      | 4.62  | 6.99  | 10            | 0.07            | bdl                 | 0.04 | 0.04 |
| In                          | 0.07         | 0.07 | 0.09 | 0.03                 | 0.05                  | 0.05 | bdl  | bdl   | bdl       | 0.04  | 0.06  | 0.06          | bdl             | bdl                 | bdl  | bdl  |
| Mo                          | bdl          | bdl  | bdl  | bdl                  | 1.05                  | bdl  | 1.03 | bdl   | 0.86      | bdl   | bdl   | bdl           | bdl             | bdl                 | bdl  | bdl  |
| Nb                          | 0.58         | 1.60 | 2.20 | 11                   | 10                    | 11   | 6.09 | 10    | 11        | 11    | 16    | 15            | 1.08            | 0.20                | 0.57 | 0.57 |
| Ni                          | 15           | 16   | 20   | bdl                  | bdl                   | bdl  | bdl  | bdl   | bdl       | 2.27  | 2.78  | 2.87          | 1585            | 1318                | 1232 | 1232 |
| Pb                          | 2.10         | 3.92 | 3.13 | 4.12                 | 18                    | 12   | 14   | 15    | 19        | 13    | 13    | 3.32          | 0.83            | 1.07                | 0.91 | 0.91 |
| Rb                          | 19           | 0.60 | 0.64 | 83                   | 41                    | 39   | 13   | bdl   | 11        | 16    | 94    | 0.74          | 0.20            | 0.30                | 0.38 | 0.38 |
| Sc                          | 76           | 63   | 94   | 6.99                 | 14                    | 11   | 4.12 | 13    | 14        | 12    | 16    | 21            | 5.58            | 3.72                | 5.44 | 5.44 |
| Sb                          | 0.80         | 1.91 | 2.58 | 1.16                 | 0.26                  | 0.23 | 0.19 | bdl   | 0.23      | 0.23  | 0.26  | 0.08          | 0.41            | 0.09                | 0.07 | 0.07 |
| Sn                          | bdl          | bdl  | bdl  | 2.46                 | 2.14                  | 2.85 | 1.94 | 1.95  | 2.64      | 3.84  | 4.74  | 3.01          | 0.66            | bdl                 | 0.40 | 0.40 |
| Sr                          | 377          | 557  | 327  | 71                   | 367                   | 273  | 377  | 638   | 718       | 412   | 444   | 141           | 0.97            | 1.16                | 6.12 | 6.12 |
| Ta                          | 0.08         | 0.19 | 0.19 | 0.99                 | 1.10                  | 0.98 | 0.79 | 0.81  | 1.19      | 0.97  | 2.07  | 1.30          | 0.04            | 0.01                | 0.02 | 0.02 |
| Th                          | 0.07         | 0.26 | 0.21 | 16                   | 9.71                  | 11   | 13   | 8.36  | 7.47      | 12    | 16    | 6.33          | 0.32            | 0.23                | 0.10 | 0.10 |
| U                           | 0.04         | 0.15 | 0.14 | 2.34                 | 5.77                  | 3.34 | 2.57 | 3.77  | 3.15      | 3.33  | 3.58  | 2.31          | 0.42            | 0.22                | 0.18 | 0.18 |
| V                           | 575          | 1045 | 1076 | 22                   | 59                    | 51   | 28   | 50    | 67        | 31    | 64    | 89            | 42              | 17                  | 23   | 23   |
| W                           | 42           | 46   | 39   | bdl                  | bdl                   | bdl  | bdl  | 0.341 | 0.409     | bdl   | bdl   | bdl           | bdl             | bdl                 | bdl  | bdl  |
| Y                           | 9.18         | 9.24 | 14   | 16                   | 27                    | 23   | 12   | 20    | 25        | 29    | 41    | 31            | 1.67            | 0.63                | 1.35 | 1.35 |
| Zn                          | 87           | 86   | 113  | 42                   | 86                    | 64   | 24   | 65    | 76        | 22    | 113   | 196           | 165             | 85                  | 83   | 83   |
| Zr                          | 14           | 20   | 25   | 185                  | 288                   | 194  | 135  | 313   | 316       | 159   | 267   | 445           | 2.37            | bdl                 | 1.71 | 1.71 |

**TABLE S13:** Bulk geochemical data of the studied samples from the DBTS. Trace elements reported in ppm.

|                             | Site 3              | Site 5      | Site 3    | Site 5 | Site 4 | Site 6 |       |       |              |        | Site 7          |                     |       |            |      |      |
|-----------------------------|---------------------|-------------|-----------|--------|--------|--------|-------|-------|--------------|--------|-----------------|---------------------|-------|------------|------|------|
| Rock type                   | Ultramafic cumulate | Orthogneiss | Am-gneiss |        |        |        |       |       | Metatonalite |        | Chlorite-schist | Ultramafic cumulate |       | Blueschist |      |      |
| Sample                      | OL60                | OL08        | OL61      | OL62   | OL63   | OL06   | OL21A | OL21B | OL39         | OL40   | OL43            | OL42A               | OL42B | OL54       | OL55 | VP07 |
| <i>Trace elements (ppm)</i> |                     |             |           |        |        |        |       |       |              |        |                 |                     |       |            |      |      |
| As                          | 2.21                | bdl         | bdl       | bdl    | bdl    | bdl    | bdl   | bdl   | bdl          | bdl    | bdl             | bdl                 | bdl   | 1.18       | bdl  | bdl  |
| Ba                          | bdl                 | 655         | bdl       | 72     | bdl    | 8.82   | 9.40  | 5.90  | 24           | < L.D. | 27              | 6.55                | bdl   | bdl        | bdl  | 789  |
| Be                          | 0.22                | 2.30        | 1.49      | 1.09   | 1.16   | 0.77   | 1.20  | 1.33  | 0.91         | 0.61   | 0.94            | 0.29                | 0.19  | 0.58       | 0.06 | 3.57 |
| Bi                          | 0.10                | 0.08        | 0.11      | 0.11   | 0.26   | 0.06   | 0.26  | 0.16  | bdl          | 0.13   | 0.08            | 0.16                | 0.08  | 0.15       | bdl  | 0.19 |
| Cd                          | 0.02                | 0.04        | 0.06      | 0.04   | 0.08   | 0.04   | bdl   | 0.05  | 0.05         | 0.03   | 0.02            | 0.08                | 0.08  | 0.06       | bdl  | 0.43 |
| Co                          | 158                 | 5.01        | 1.93      | 1.82   | 3.01   | 2.63   | 0.78  | 2.08  | 4.09         | 3.02   | 3.26            | 9.24                | 53    | 122        | 70   | 6.08 |
| Cr                          | 2084                | 5.09        | 5.88      | 4.92   | 7.22   | 5.02   | 4.27  | 5.49  | 11           | 8.82   | 6.44            | 14                  | 43    | 3829       | 1560 | 44   |
| Cs                          | 0.34                | 0.59        | bdl       | 0.20   | bdl    | bdl    | bdl   | bdl   | 0.33         | 0.07   | 0.02            | 0.07                | 0.09  | 0.14       | 0.26 | 1.99 |
| Cu                          | 51                  | bdl         | 3.37      | 9.10   | 13     | 3.80   | 7.12  | 6.43  | 11           | 11     | 3.97            | 30                  | 8.16  | 119        | 14   | 18   |
| Ga                          | 5.93                | 20          | 17        | 14     | 21     | 15     | 13    | 16    | 20           | 15     | 15              | 22                  | 27    | 4.77       | 1.86 | 24   |
| Ge                          | 0.83                | 1.22        | 0.92      | 0.92   | 1.34   | 0.55   | 0.46  | 1.20  | 1.12         | 0.40   | 0.59            | 0.75                | 0.70  | 1.01       | 0.75 | 2.25 |
| Hf                          | 0.08                | 4.76        | 4.02      | 3.23   | 7.59   | 3.99   | 1.60  | 4.01  | 11           | 4.75   | 3.36            | 17                  | 7.19  | 0.09       | 0.06 | 9.84 |
| In                          | bdl                 | bdl         | bdl       | bdl    | 0.06   | bdl    | bdl   | bdl   | 0.04         | bdl    | bdl             | 0.03                | 0.04  | bdl        | bdl  | 0.09 |
| Mo                          | bdl                 | bdl         | 0.80      | bdl    | bdl    | 1.81   | 0.81  | 0.80  | bdl          | 0.82   | bdl             | bdl                 | bdl   | bdl        | bdl  | 1.46 |
| Nb                          | 0.09                | 9.35        | 7.74      | 6.35   | 9.95   | 11     | 17    | 9.08  | 9.89         | 5.71   | 6.85            | 17                  | 16    | 0.22       | 0.43 | 18   |
| Ni                          | 1538                | 2.39        | bdl       | 2.24   | 3.16   | 3.11   | 2.02  | 2.59  | 16           | 4.29   | 5.53            | 19                  | 197   | 2310       | 764  | 16   |
| Pb                          | 1.21                | 5.95        | 9.61      | 12     | 20     | 1.44   | 1.70  | 13    | 3.11         | 0.77   | 2.33            | 1.18                | bdl   | 3.34       | 0.67 | 44   |
| Rb                          | 0.43                | 61          | 0.16      | 14     | 0.45   | 0.43   | 0.26  | 0.29  | 2.12         | 0.46   | 1.86            | 0.55                | 0.38  | 0.25       | 0.56 | 103  |
| Sc                          | 6.21                | 4.96        | 6.61      | 4.53   | 17     | 6.84   | 1.33  | 4.72  | 6.37         | 4.36   | 3.41            | 8.92                | 9.42  | 8.99       | 4.08 | 23   |
| Sb                          | 0.28                | 0.17        | 0.16      | 0.11   | 0.24   | 0.23   | 0.15  | 0.22  | bdl          | bdl    | bdl             | bdl                 | bdl   | 0.35       | 0.12 | bdl  |
| Sn                          | bdl                 | 1.42        | 3.00      | 2.14   | 2.18   | 2.81   | 2.59  | 2.69  | 6.76         | 3.25   | 2.62            | 7.31                | 6.19  | 0.34       | 0.36 | 2.84 |
| Sr                          | 4.56                | 226         | 326       | 212    | 797    | 39     | 37    | 350   | 69           | 9.84   | 85              | 32                  | 8     | 1.82       | 0.70 | 363  |
| Ta                          | 0.01                | 0.85        | 0.86      | 0.70   | 1.00   | 1.24   | 6.94  | 0.68  | 0.41         | 0.30   | 0.68            | 0.81                | 0.81  | 0.02       | 0.03 | 1.46 |
| Th                          | 0.10                | 11          | 14        | 12     | 5.16   | 18     | 4.68  | 19    | 72           | 1.75   | 8.73            | 49                  | 28    | 0.11       | 0.76 | 10   |
| U                           | 0.04                | 2.56        | 2.39      | 1.38   | 1.91   | 2.18   | 2.55  | 3.56  | 1.72         | 0.99   | 1.01            | 2.51                | 1.43  | 0.13       | 0.08 | 2.00 |
| V                           | 33                  | 38          | 31        | 26     | 84     | 13     | 4.38  | 37    | 12           | 15     | 10              | 18                  | 40    | 46         | 12   | 87   |
| W                           | bdl                 | bdl         | bdl       | bdl    | bdl    | bdl    | bdl   | bdl   | bdl          | bdl    | bdl             | bdl                 | bdl   | bdl        | bdl  | 1.16 |
| Y                           | 1.86                | 14          | 17        | 13     | 22     | 18     | 3     | 12    | 19           | 6.81   | 14              | 18                  | 13    | 2.06       | 0.73 | 51   |
| Zn                          | 102                 | 58          | 30        | 24     | 62     | 14     | 7.32  | 30    | 33           | 21     | 19              | 31                  | 172   | 129        | 105  | 140  |
| Zr                          | 2.17                | 174         | 133       | 109    | 327    | 124    | 41    | 147   | 326          | 201    | 121             | 541                 | 254   | 2.02       | 1.73 | 404  |

**TABLE S14:** Bulk geochemical data of the studied samples from the DBTS. Trace elements reported in ppm.

| Rock type                 | Site 1       |      |      | Site 2               |                       |      |           |      |       |               |                 |                     |       |      |      |
|---------------------------|--------------|------|------|----------------------|-----------------------|------|-----------|------|-------|---------------|-----------------|---------------------|-------|------|------|
|                           | Hornblendite |      |      | Foliated orthogneiss | Mylonitic orthogneiss |      | Am-gneiss |      |       | Mu-rich layer | Chlorite-schist | Ultramafic cumulate |       |      |      |
|                           | Sample       | OL02 | OL03 | OL04                 | OL25                  | OL24 | OL23      | OL50 | OL68B | OL68A         | OL49C           | OL49B               | OL49A | OL35 | OL34 |
| <i>REE elements (ppm)</i> |              |      |      |                      |                       |      |           |      |       |               |                 |                     |       |      |      |
| La                        | 1.89         | 3.19 | 4.07 | 59                   | 45                    | 43   | 30        | 36   | 30    | 40            | 45              | 39                  | 1.37  | 1.21 | 0.76 |
| Ce                        | 5.39         | 8.55 | 12   | 119                  | 94                    | 86   | 60        | 72   | 60    | 82            | 93              | 80                  | 3.95  | 2.64 | 2.01 |
| Pr                        | 0.92         | 1.27 | 1.99 | 12                   | 10                    | 8.90 | 6.15      | 8.10 | 7.18  | 8.79          | 10              | 8.97                | 0.64  | 0.30 | 0.37 |
| Nd                        | 5.14         | 6.01 | 10   | 41                   | 37                    | 31   | 21        | 29   | 27    | 32            | 38              | 35                  | 2.86  | 1.10 | 1.66 |
| Sm                        | 1.67         | 1.72 | 3.09 | 6.28                 | 6.43                  | 5.48 | 3.52      | 4.81 | 5.38  | 6.28          | 8.04            | 7.08                | 0.56  | 0.18 | 0.44 |
| Eu                        | 0.63         | 0.57 | 0.82 | 0.99                 | 1.58                  | 1.22 | 0.93      | 1.68 | 1.48  | 1.33          | 2.20            | 1.76                | 0.07  | 0.02 | 0.07 |
| Gd                        | 1.77         | 1.72 | 2.96 | 4.29                 | 5.19                  | 4.56 | 2.71      | 3.80 | 4.66  | 5.31          | 7.21            | 6.11                | 0.39  | 0.12 | 0.30 |
| Tb                        | 0.30         | 0.28 | 0.50 | 0.59                 | 0.79                  | 0.69 | 0.38      | 0.57 | 0.73  | 0.83          | 1.17            | 0.93                | 0.05  | 0.02 | 0.04 |
| Dy                        | 1.90         | 1.76 | 3.02 | 3.20                 | 4.71                  | 4.20 | 2.20      | 3.41 | 4.48  | 5.10          | 7.27            | 5.78                | 0.25  | 0.09 | 0.22 |
| Ho                        | 0.38         | 0.35 | 0.59 | 0.62                 | 0.97                  | 0.87 | 0.46      | 0.71 | 0.94  | 1.05          | 1.51            | 1.17                | 0.06  | 0.02 | 0.04 |
| Er                        | 0.94         | 0.93 | 1.45 | 1.63                 | 2.68                  | 2.33 | 1.27      | 2.01 | 2.59  | 2.86          | 4.10            | 3.17                | 0.17  | 0.07 | 0.11 |
| Tm                        | 0.12         | 0.13 | 0.19 | 0.23                 | 0.39                  | 0.34 | 0.18      | 0.30 | 0.38  | 0.42          | 0.60            | 0.48                | 0.03  | 0.01 | 0.02 |
| Yb                        | 0.76         | 0.81 | 1.22 | 1.62                 | 2.80                  | 2.43 | 1.31      | 2.12 | 2.70  | 2.75          | 4.05            | 3.30                | 0.19  | 0.08 | 0.13 |
| Lu                        | 0.10         | 0.12 | 0.17 | 0.25                 | 0.45                  | 0.38 | 0.20      | 0.35 | 0.42  | 0.42          | 0.60            | 0.50                | 0.03  | 0.02 | 0.02 |
| ΣREE                      | 15           | 16   | 26   | 251                  | 213                   | 191  | 130       | 165  | 148   | 189           | 223             | 192                 | 11    | 5.89 | 6.19 |

**TABLE S15:** Bulk geochemical data of the studied samples from the DBTS. Trace elements reported in ppm.



|                           | Site 3      | Site 5              | Site 3     |      | Site 5 |      | Site 4 |       | Site 6       |      |      |                 |                     |      | Site 7     |      |
|---------------------------|-------------|---------------------|------------|------|--------|------|--------|-------|--------------|------|------|-----------------|---------------------|------|------------|------|
| Rock type                 | Orthogneiss | Ultramafic cumulate | Amp-gneiss |      |        |      |        |       | Metatonalite |      |      | Chlorite-schist | Ultramafic cumulate |      | Blueschist |      |
| Sample                    | OL60        | OL08                | OL61       | OL62 | OL63   | OL06 | OL21A  | OL21B | OL39         | OL40 | OL43 | OL42A           | OL42B               | OL54 | OL55       | VP07 |
| <i>REE elements (ppm)</i> |             |                     |            |      |        |      |        |       |              |      |      |                 |                     |      |            |      |
| La                        | 0.53        | 49                  | 30         | 27   | 22     | 32   | 9.11   | 49    | 102          | 7.76 | 21   | 86              | 40                  | 1.41 | 1.03       | 43   |
| Ce                        | 1.13        | 97                  | 61         | 54   | 47     | 68   | 18     | 95    | 234          | 16   | 47   | 188             | 91                  | 2.67 | 3.68       | 96   |
| Pr                        | 0.16        | 9.67                | 6.65       | 5.75 | 5.42   | 7.38 | 1.97   | 9.42  | 28           | 1.81 | 5.31 | 22              | 10                  | 0.28 | 0.46       | 12   |
| Nd                        | 0.64        | 32                  | 23         | 20   | 22     | 26   | 6.54   | 30    | 101          | 6.82 | 19   | 78              | 36                  | 1.04 | 1.90       | 48   |
| Sm                        | 0.18        | 4.85                | 4.31       | 3.56 | 4.60   | 4.90 | 1.26   | 4.58  | 23           | 1.47 | 4.21 | 16              | 7.98                | 0.25 | 0.48       | 11   |
| Eu                        | 0.06        | 1.10                | 0.87       | 0.73 | 1.48   | 0.71 | 0.21   | 0.84  | 1.11         | 0.76 | 0.91 | 1.32            | 0.83                | 0.10 | 0.03       | 1.69 |
| Gd                        | 0.19        | 3.52                | 3.49       | 2.80 | 4.15   | 3.88 | 0.91   | 3.28  | 15           | 1.31 | 3.29 | 10              | 5.56                | 0.29 | 0.33       | 10   |
| Tb                        | 0.04        | 0.47                | 0.51       | 0.40 | 0.64   | 0.58 | 0.13   | 0.42  | 1.54         | 0.19 | 0.48 | 1.12            | 0.67                | 0.05 | 0.04       | 1.52 |
| Dy                        | 0.27        | 2.70                | 3.12       | 2.44 | 4.03   | 3.50 | 0.67   | 2.29  | 6.08         | 1.13 | 2.64 | 4.79            | 3.10                | 0.36 | 0.18       | 9.34 |
| Ho                        | 0.06        | 0.51                | 0.63       | 0.49 | 0.84   | 0.70 | 0.13   | 0.44  | 0.80         | 0.25 | 0.51 | 0.72            | 0.51                | 0.08 | 0.03       | 1.95 |
| Er                        | 0.20        | 1.42                | 1.71       | 1.35 | 2.31   | 1.86 | 0.35   | 1.15  | 1.47         | 0.74 | 1.32 | 1.59            | 1.17                | 0.21 | 0.07       | 5.07 |
| Tm                        | 0.03        | 0.21                | 0.24       | 0.19 | 0.33   | 0.27 | 0.05   | 0.15  | 0.14         | 0.11 | 0.19 | 0.20            | 0.15                | 0.03 | 0.01       | 0.71 |
| Yb                        | 0.27        | 1.66                | 1.71       | 1.27 | 2.45   | 1.86 | 0.40   | 1.07  | 0.86         | 0.86 | 1.35 | 1.41            | 0.96                | 0.23 | 0.06       | 4.82 |
| Lu                        | 0.04        | 0.29                | 0.26       | 0.19 | 0.38   | 0.28 | 0.07   | 0.17  | 0.14         | 0.16 | 0.22 | 0.24            | 0.15                | 0.04 | 0.01       | 0.75 |
| ΣREE                      | 3.83        | 205                 | 138        | 121  | 118    | 152  | 40     | 198   | 515          | 40   | 109  | 412             | 199                 | 7    | 8          | 246  |

**TABLE S16:** Bulk geochemical data of the studied samples from the DBTS. Trace elements reported in ppm.

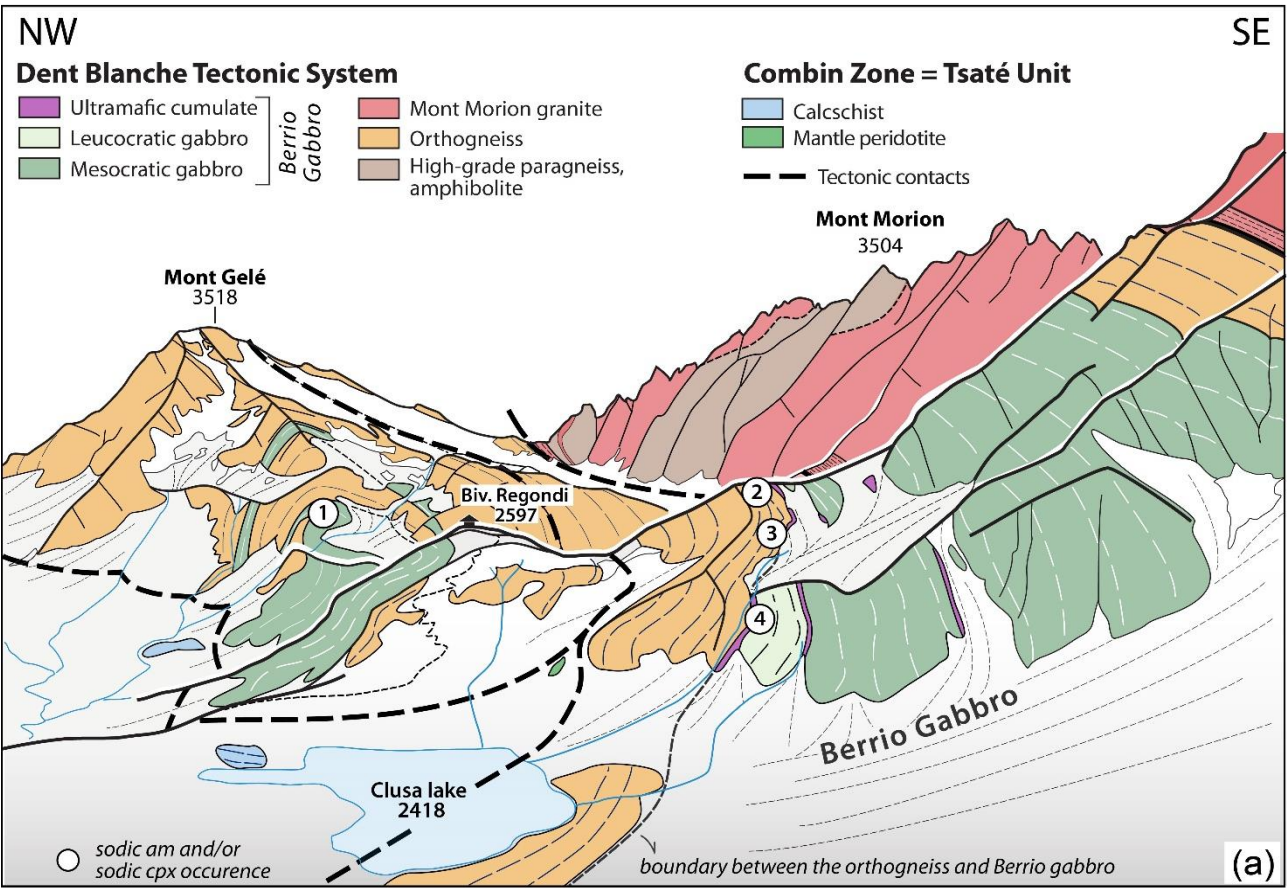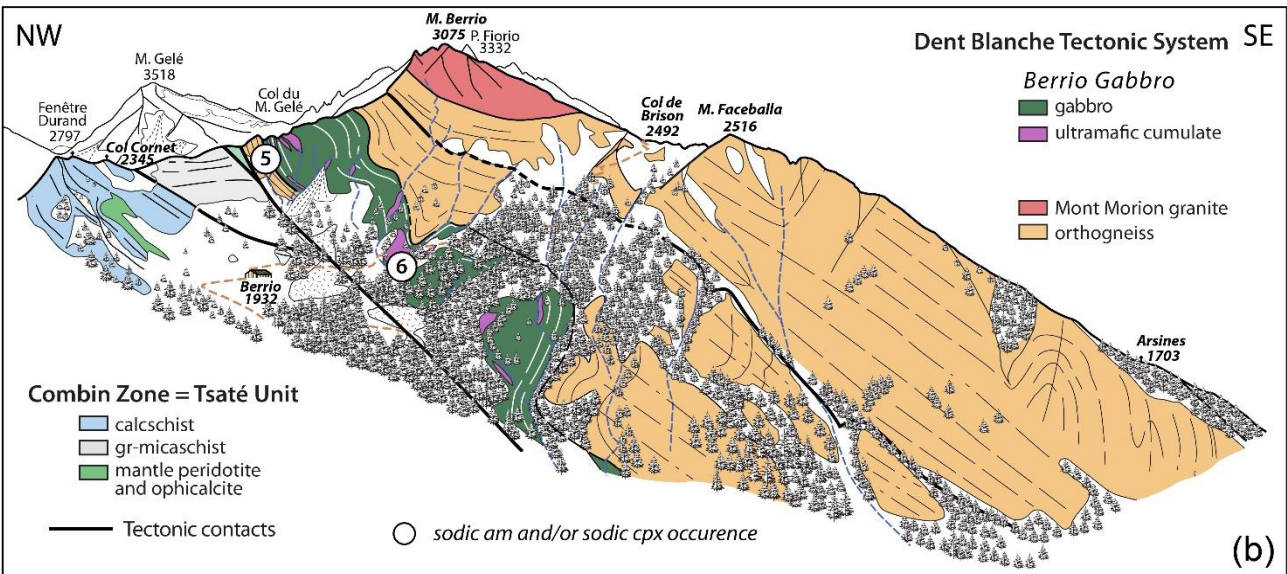

**FIGURE S1** (a). Panorama of left bank of the Ollomont valley, between the Mont Gelé and the Mont Morion where sodic amphibole and sodic clinopyroxene (numbered white circles) have been found in the Dent Blanche Tectonic System. The Baseya Lake is located behind the small pass between the Regondi bivouac and site 2. (b) Panorama from Plan Debat, showing the contact between the Combin Zone (Tsaté Unit) and the Dent Blanche Tectonic System. The numbered white circles refer to the occurrences of sodic amphibole and/or sodic clinopyroxene in the Dent Blanche Tectonic System. Locality #7 (see Table 1) is not located in the area of the two panoramas. More details about the tectonic setting of the areas can be found in Manzotti *et al.*, 2017.

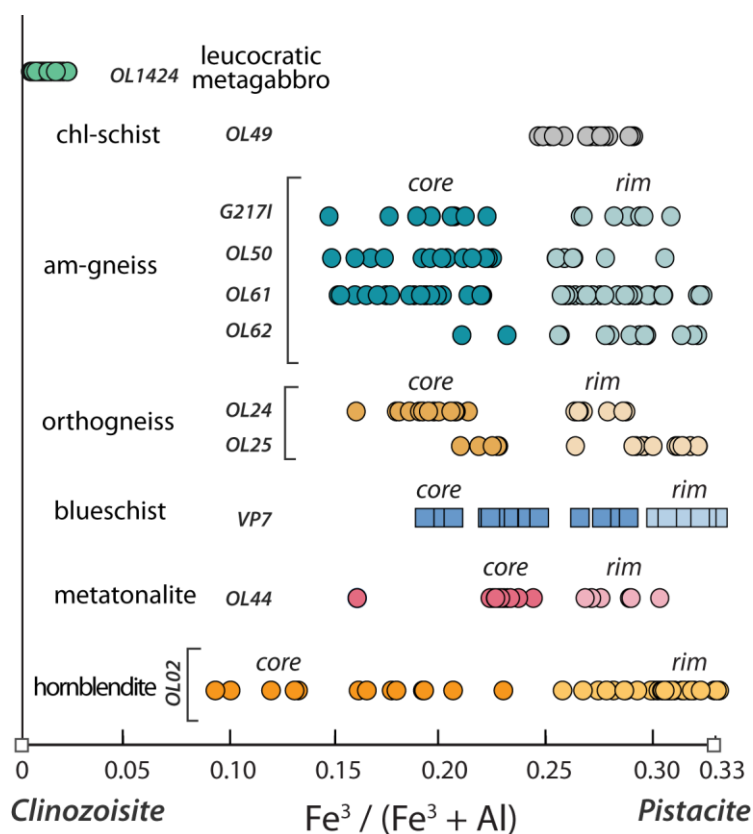

**FIGURE S2:** Chemical composition of epidote in the studied samples. Epidote in the leucocratic metagabbro (sample OL1424) shows the lowest  $Fe^{3+}$  content. In all the other samples, epidote displays an increase in  $Fe^{3+}$  from core to rim.

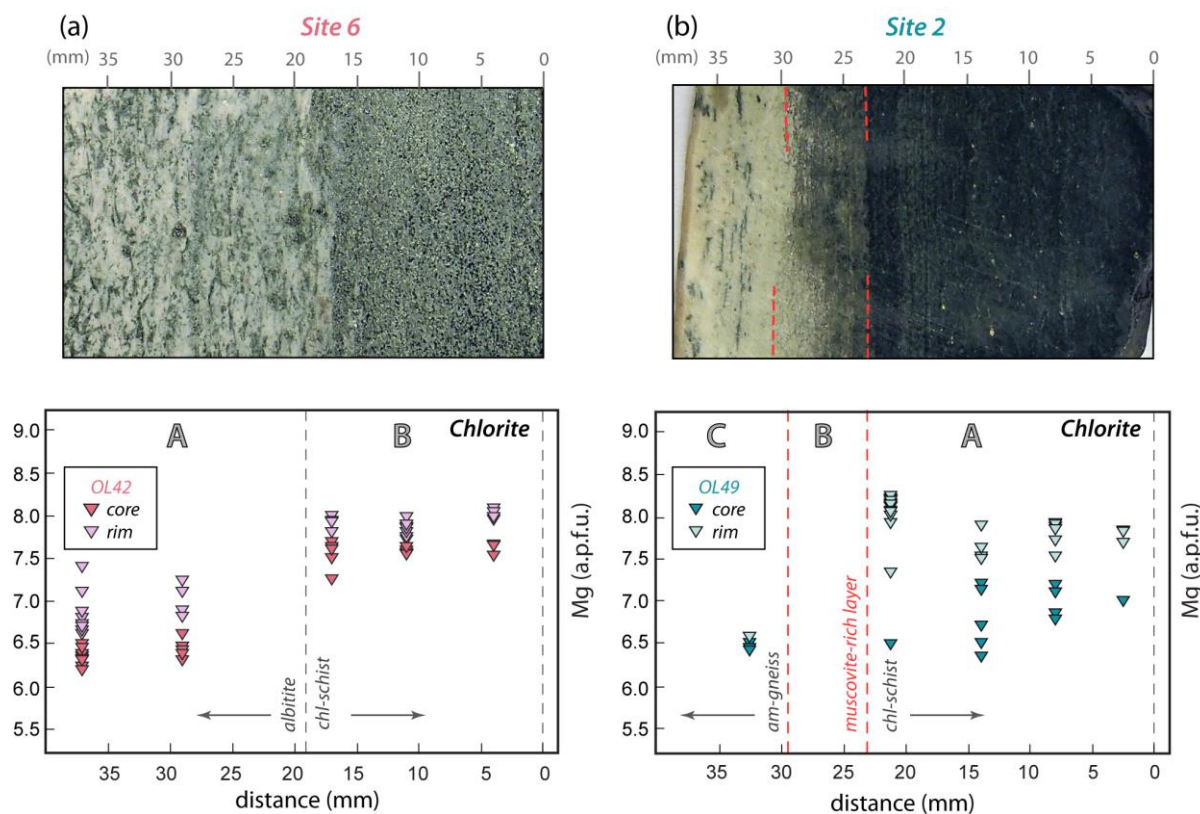

**FIGURE S3** Photographs of the thin sections (sample OL42 and OL49) and chemical composition of chlorite at the contact with the ultramafic cumulate of the Berrio Gabbro (a) in the metatonalite (site 6) and (b) in the amphibole-gneiss and chlorite-schist along the profile of site 2.

## ***P*-H<sub>2</sub>O modelling**

The previous calculations are based on the assumption that H<sub>2</sub>O was in excess during the metamorphic evolution. Here, we evaluate the possibility that metamorphism occurred under H<sub>2</sub>O-undersaturated conditions. The aim of this modelling is to test if the absence of sodic amphibole in some rock types (e.g. in the orthogneiss and leucocratic metagabbro) can be linked to a limited H<sub>2</sub>O content in the system. The red lines in the calculated *P*-H<sub>2</sub>O pseudosections (Figs. S4 and S5) represent the H<sub>2</sub>O-saturation surface and divide the diagrams in a H<sub>2</sub>O-saturated (right) and a H<sub>2</sub>O-undersaturated (left) part. All the calculated diagrams show that H<sub>2</sub>O-undersaturation leads to important rapid variations of the stable mineral assemblages, including crystallisation of minerals commonly not expected for a given rock type. In the bulk compositions investigated, at a given *T*, the minimum *P* of the stability field of sodic amphibole is generally rapidly displaced to higher *P* with increasing H<sub>2</sub>O-undersaturation.

A relatively large amount of H<sub>2</sub>O (~ 4-4.5 wt%, depending on *P*; Fig. S4a) is required to reach H<sub>2</sub>O-saturated conditions in the *hornblendite* (*OL02*). With increasing H<sub>2</sub>O-undersaturation, the minimum *P* of sodic amphibole stability first slightly decreases by ~0.5 kbar down to 8 kbar, then (for <3.4 wt% H<sub>2</sub>O) rapidly increases up to >12kbar (for <1.3 wt% H<sub>2</sub>O). When H<sub>2</sub>O undersaturation is reached, the first changes of the mineral assemblages involve the disappearance of titanite, and the stabilisation of rutile, hornblende and garnet over the entire *P* interval explored. Chloritoid appears at *P* > 8 kbar, and staurolite for *P* > 5.5 kbar at H<sub>2</sub>O ~1.6-2.6 wt%; kyanite becomes stable for H<sub>2</sub>O contents lower than ~3 wt% at 12 kbar and ~1.8 wt% at 4 kbar. These minerals have never been observed in the studied sample. Consequently, the H<sub>2</sub>O-saturated pseudosection yields the best match between the model and petrological observations.

A limited amount of H<sub>2</sub>O (~ 0.2-0.3 wt%, depending of *P*; Fig. S4b) is required to reach H<sub>2</sub>O-saturated conditions in the *metatonalite* (*OL43*). The stability of sodic amphibole increases towards low *P* with incipient H<sub>2</sub>O-undersaturation, with a minimum *P* of ~4.5 kbar for ~0.2 wt% H<sub>2</sub>O. Lower H<sub>2</sub>O contents lead however to a rapid increase of this minimum *P*. When H<sub>2</sub>O undersaturation is reached, titanite is the first mineral that disappear from the stable assemblages, whereas hornblende, kyanite, cummingtonite, ilmenite, garnet and olivine become stable depending on *P* and the exact amount of H<sub>2</sub>O. Again, the H<sub>2</sub>O-saturated calculation provides the best fit between the model and petrological observations.

A relatively large amount of H<sub>2</sub>O (~ 4-6.5 wt%, depending of *P*; Fig. S4c) is required to reach H<sub>2</sub>O-saturated conditions in the *blueschist* (*VP7*). Sodic amphibole is stable only at *P* higher than ~7 kbar and H<sub>2</sub>O contents higher than ~3.5 wt% (H<sub>2</sub>O saturation or limited undersaturation only). H<sub>2</sub>O undersaturation leads to various modifications of the mineral assemblages (Fig. S4c). The most

important modification involve the stabilisation of biotite, hematite, K-feldspar and kyanite over the entire  $P$  interval studied. Yet, these minerals have never been observed in the studied rock.

A moderate  $H_2O$  amount of  $\sim 0.6$ - $1.5$  wt% (depending of  $P$ ; Fig. S4d) is required to reach  $H_2O$ -saturated conditions in the *amphibole-gneiss (OL68B)*. Moderate  $H_2O$ -undersaturation increases the stability of sodic amphibole by  $\sim 1$  kbar and  $\sim 2$  kbar towards low and high  $P$ , respectively, but for low amounts of  $H_2O$  leads to its disappearance (Fig. S4d). When  $H_2O$  undersaturation is reached, titanite disappears at  $H_2O \sim 0.5$ - $0.75$  wt%. At lower  $H_2O$  content, hornblende, garnet, and kyanite, among others, become stable almost over the entire  $P$  interval explored. These minerals are never observed in the rock and consequently the assumption of  $H_2O$  in excess, which yields the best fit between observations and the thermodynamic modelling, appears as the most adapted.

The *leucocratic metagabbro (OL1424)* requires  $\sim 2.2$ - $2.4$  wt% of  $H_2O$  (depending of  $P$ ; Fig. S5a) to reach  $H_2O$ -saturated conditions. Even moderate  $H_2O$ -undersaturation results in a rapid displacement of the minimum  $P$  limit of the stability field of sodic amphibole to higher  $P$ . From this point of view,  $H_2O$ -undersaturated conditions could explain the lack of sodic amphibole in this lithology. However,  $H_2O$ -undersaturation also leads to the appearance of minerals like hornblende, paragonite, kyanite, plagioclase, K-feldspar, or corundum (depending on  $P$  conditions), none of which was observed in this rock. The discrepancies between the petrological observations and the model indicate that the assumption of  $H_2O$  in excess for the modelling of the leucocratic metagabbro was correct.

As for the leucocratic metagabbro, in the *orthogneiss (14)*  $H_2O$ -undersaturation results in a rapid displacement of the minimum  $P$  limit of the stability field of sodic amphibole to higher  $P$  (Fig. S5b). Here again, however, minerals like garnet, kyanite and K-feldspar, never observed in the rock, become progressively stable with increasing  $H_2O$ -undersaturation. The discrepancies between petrological observations and the model suggest that the lack of free  $H_2O$  does not explain the absence of sodic amphibole in the orthogneiss.

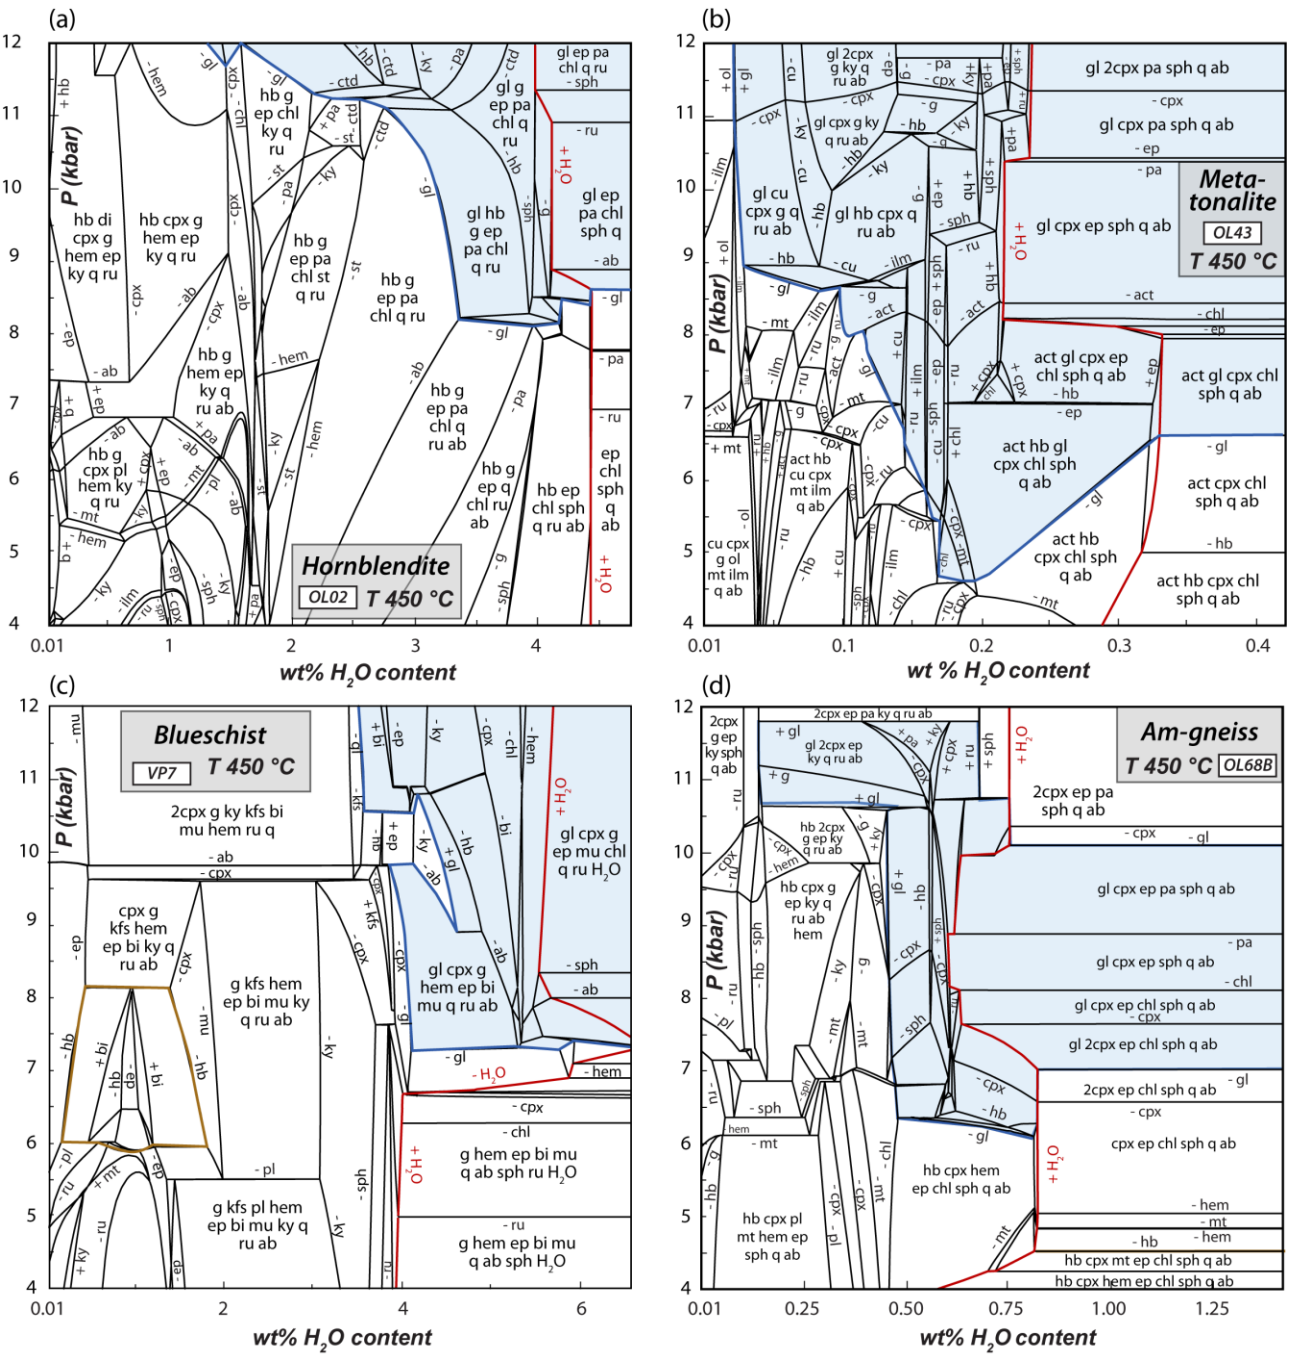

**FIGURE S4** *P*-*X* H<sub>2</sub>O pseudosections for the studied samples (a) OL02, hornblende, (b) OL43, metatonalite (c) VP7, blueschist. The blue field indicates the *P*-*T* space where sodic amphibole is stable. Some fields are not labelled for sake of clarity; their mineral assemblages can be deduced from assemblages in adjacent fields. The red lines represent the H<sub>2</sub>O-saturation surface and divide the diagram in a H<sub>2</sub>O saturated (right) and in a H<sub>2</sub>O-undersaturated (left) part.

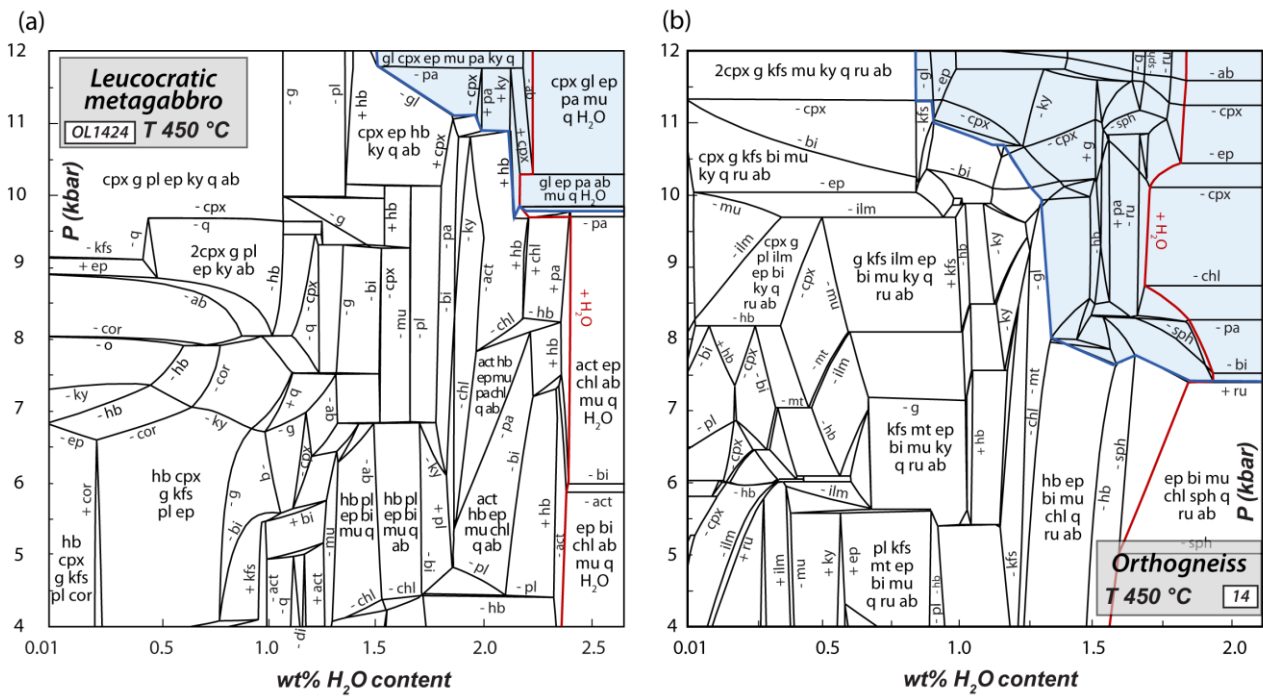

**FIGURE S5**  $P$ - $X_{H_2O}$  pseudosections for the studied samples (a) OL1424, leucocratic metagabbro, (b) 14, orthogneiss. The blue field indicates the  $P$ - $T$  space where sodic amphibole is stable. Some fields are not labelled for sake of clarity; their mineral assemblages can be deduced from assemblages in adjacent fields. The red lines represent the  $H_2O$ -saturation surface and divide the diagram in a  $H_2O$  saturated (right) and in a  $H_2O$ -undersaturated (left) part.

## REFERENCES

- Angiboust, S., Glodny, J., Oncken, O. & Chopin, C. (2014). In search of transient subduction interfaces in the Dent Blanche–Sesia Tectonic System (W. Alps). *Lithos* **205**, 298–321.
- Ayrton, S., Bugnon, C., Haarpainter, T., Weidmann, M. & Frank, E. (1982). Géologie du front de la nappe de la Dent Blanche dans la région des Monts-Dolins, Valais. *Eclogae Geologicae Helvetiae* **75**, 269–286.
- Baletti, L., Zanoni, D., Spalla, M. I. & Gosso, G. (2012). Structural and petrographic map of the Sassa gabbro complex (Dent Blanche nappe, Austroalpine tectonic system, Western Alps, Italy). *Journal of Maps* **8(4)**, 413–430.
- Ballèvre, M. & Kienast, J.R. (1987). Découverte et signification de paragenèses a grenat amphibole bleue dans la couverture mésozoïque de la nappe de la Dent-Blanche (Alpes Occidentales). *Comptes Rendus de l'Académie des Sciences Paris II* **305**, 43–46.
- Canepa, A., Castelletto, M., Cesare, B., Martin, S. & Zaggia, L. (1990). The Austroalpine Mont Mary nappe (Italian Western Alps). *Memorie di Scienze Geologiche* **42**, 1-17.
- Dal Piaz, G.V., Bistacchi, A., Gianotti, F., Monopoli, B. & Passeri, L. (2015). Note illustrative della Carta Geologica d'Italia alla scala 1:50000. *Servizio Geologico d'Italia, Roma, Foglio 070 Cervino*, 1-431.
- De Leo, S., Biino, G. & Compagnoni, R. (1987). Riequilibrazioni metamorfiche alpine nella serie di Valpelline e di Arolla a Nord di Bionaz (Valpelline-Aosta). *Rendiconti della Società Italiana di Mineralogia e Petrologia* **42**, 181–182.
- Diehl E. (1938). Geologisch-Petrographische Untersuchungen der Zone du Grand Combin im Val d'Ollomont. *Schweizerische Mineralogische und Petrographische Mitteilungen* **18**, 214-401.
- Diehl, E. A., Masson, R. & Stutz, A. H. (1952). Contributo alla conoscenza del ricoprimento della Dent Blanche. *Memorie degli Istituti di Geologia e Mineralogia dell'Università di Padova* **17**, 1–52.
- Stutz, A.H. (1940). Die Gesteine der Arollaserie im Valpelline (Provinz Aosta, Oberitalien). *Schweizerische mineralogische und petrographische Mitteilungen* **20**, 118-246.
- Manzotti, P. (2011). Petro-structural map of the Dent Blanche tectonic system between Valpelline and Valtournenche valleys, Western Italian Alps—1: 20 000, 1: 10 000, 1: 2500. *Journal of Maps* **7**, 340–352.
- Manzotti, P., Rubatto, D., Darling, J., Zucali, M., Cenko-Tok, B., Engi, M. (2012). From Permo-Triassic lithospheric thinning to Jurassic rifting at the Adriatic margin: petrological and geochronological record in Valtournenche (Western Italian Alps). *Lithos* **146-147**, 276-292.
- Manzotti, P., Zucali, M., Ballèvre, M., Robyr, M., & Engi, M. (2014a). Geometry and kinematics of the Roisan-Cignana Shear Zone, and the orogenic evolution of the Dent Blanche Tectonic Ssystem (Western Alps). *Swiss Journal of Geosciences* **107**, 23-47.
- Pennacchioni, G., & Guermani, A. (1993). The mylonites of the Austroalpine Dent Blanche nappe along the northwestern side of the Valpelline Valley (Italian Western Alps). *Memorie di Scienze Geologiche* **45**, 37-55.



Roda, M., & Zucali, M. (2008). Meso and microstructural evolution of the Mont Morion metaintrusives complex (Dent Blanche nappe, Austroalpine domain, Valpelline, Western Italian Alps). *Italian Journal of Geosciences* **127**, 105–123.

Roda, M., & Zucali, M. (2011). Tectono-metamorphic map of the Mont Morion Permian metaintrusives (Mont Morion-Mont Collon-Matterhorn Complex, Dent Blanche Unit), Valpelline-Western Italian Alps-1:10 000. *Journal of Maps* **7**, 519–535.
